1 **Title:** Low back pain care pathways – is the last provider seen more important than the first: A  
2 retrospective cohort study

3

4 **Authors:**

5 David Elton, DC, Optum Labs, Eden Prairie, Minnesota USA

6 Meng Zhang, PhD, Optum Labs, Eden Prairie, Minnesota USA

7

8 **Corresponding author:**

9 David Elton

10 Optum Labs

11 11000 Optum Circle, Eden Prairie, MN 55343

12 Phone: (952) 562-1349

13 [david.elton@optum.com](mailto:david.elton@optum.com)

14 **Declarations**

15 **Ethics approval and consent to participate**

16 Because the data was de-identified or a Limited Data Set in compliance with the Health Insurance  
17 Portability and Accountability Act and customer requirements, the UnitedHealth Group Office of Human  
18 Research Affairs determined that this study was exempt from Institutional Review Board review.

19 **Consent for publication**

20 Not applicable

21 **Availability of data and materials**

22 The data are proprietary and are not available for public use but, under certain conditions, may be made  
23 available to editors and their approved auditors under a data-use agreement to confirm the findings of  
24 the current study.

25 **Competing interests**

26 At the time of manuscript submission **DE and MZ** are UnitedHealth Group employees and UNH  
27 stockholders. No other potential conflicts of interest or competing interests exist.

28 **Funding**

29 None

30 **Authors' contributions**

31 Study conception and design; **DE**. Data acquisition; **DE, MZ**. Data analysis and interpretation; **DE, MZ**.  
32 Draft or substantially revise manuscript; **DE, MZ**.

33 **Acknowledgements**

34

35 **Abstract**

36 **Background:** The associations between the type of health care provider (HCP) initially contacted by an  
37 individual with low back pain (LBP), guideline concordance, and cost of care are well understood. Less is  
38 known about types of HCP that become involved after the initial HCP, particularly the last HCP. The  
39 purpose of this retrospective cohort study was to examine sequence patterns in the types of HCP  
40 involved in an episode of LBP, exposure to 13 types of services, and total cost.

41 **Methods:** A US national sample of commercially insured individuals with a single episode of non-surgical  
42 LBP occurring in 2017-2019 was analyzed using episode of care unit of analysis. The primary  
43 independent variable was the type of initial contact HCP. Dependent measures included types of  
44 subsequent HCPs involved in an episode of LBP, rate of use of 13 types of health care services, and total  
45 cost.

46 **Results:** 503,958 individuals aged 18 years and older initially contacted 196,522 different HCPs for an  
47 episode of non-surgical LBP. 30.2% of individuals saw a second HCP, 11.8% a third, 5.2% a fourth and  
48 2.5% a fifth. Compared to primary care providers (PCP) (71.0% of episodes), when chiropractors (DC)  
49 were the initial contact HCP they were the most likely to be the only and last HCP seen (84.0% of  
50 episodes) (risk ratio 1.18, 95% confidence interval 1.18-1.19). DCs were also the most likely to be the last  
51 HCP seen when the second HCP in an episode (72.7%) (1.10, 1.09-1.12), the third HCP (67.7%) (1.10,  
52 1.08-1.13), or the fourth HCP (61.6%) (1.13, 1.08-1.17). Physical therapists (PT), while less likely than  
53 PCPs to be the only and last HCP seen (60.0%) (0.84, 0.83-0.86), were more likely than PCPs to be the  
54 last HCP when the second (70.9%) (1.08, 1.06-1.09), third (63.2%) (1.03, 1.00-1.06), or fourth HCP  
55 (60.7%) (1.11, 1.06-1.16) seen during an episode. PTs were the only type of HCP involved in more  
56 episodes as the second HCP (7,344) than as the initial HCP (5,114).

57 **Conclusions:** DCs are the most likely to be the last HCP seen for an episode of non-surgical LBP. PTs are  
58 as likely as DCs to be the last HCP seen except when initially contacted by an individual with LBP. There  
59 are numerous potential confounders and limitations to consider when interpreting this novel finding.

60

61 **Keywords:** Low back pain; pathway; guideline; initial contact; first provider; last provider; utilization;

62 cost; value

## 63 **Background**

64

65 Low back pain (LBP) clinical practice guidelines (CPG) recommended a stepped approach to  
66 management with an emphasis on non-pharmaceutical and non-interventional first-line approaches for  
67 most LBP.<sup>1,2</sup> The type of health care provider (HCP) initially contacted by an individual with LBP, and  
68 associated subsequent service use and CPG concordance, is the subject of a growing body of research.<sup>3-</sup>

69 <sup>8</sup> A high proportion of individuals with LBP initially seek treatment from primary care providers (PCP) and  
70 physician specialists with management emphasizing second- and third-line approaches.<sup>3</sup> Non-prescribing  
71 HCPs, like chiropractors (DC), physical therapists (PT), or licensed acupuncturists (LAc) are more likely to  
72 have episodes associated with an emphasis on first-line therapies, with less use of second- and third-line  
73 services.<sup>3,6</sup> A variety of confounders impact the interpretation and translation of findings associated with  
74 the type of HCP initially contacted by an individual with LBP.<sup>4,6,7</sup>

75

76 Relatively little is known about longitudinal patterns of all types of HCPs involved in an episode of LBP  
77 and association with guideline concordance and total cost. Research into the sequence of types of HCPs  
78 involved in an episode of LBP has tended to focus on service use rather than types of HCPs involved, and  
79 has often focused on a single type of initial contact HCP such as PCP<sup>9,10</sup>, physiatry<sup>11</sup>, emergency  
80 medicine (EM)<sup>12,13</sup>, and PT.<sup>5,8,14</sup> These studies identified variation in approaches to LBP, yet have not  
81 provide comprehensive insights into patterns of HCP involvement in LBP. A PubMed.gov search for key  
82 terms “last provider seen” and “back pain” returned no results.

83

84 The aim of this study was to examine patterns in the types of HCP involved in a single episode of non-  
85 surgical LBP and associated total episodic use of 13 types of health care services and total cost, with a  
86 specific focus on the type of HCP seen last. The hypothesis was types of HCP emphasizing CPG

87 concordant first-line approaches, like DCs, PTs, LAcS, and doctors of osteopathy (DO), would be  
88 commonly seen as the last HCP during an episode of LBP even if becoming involved later in an episode.

89

## 90 **Methods**

91

### 92 *Study design, population, setting and data sources*

93

94 This is a retrospective cohort study of individuals with a single episode of non-surgical LBP during the  
95 2017-2019 study period. An analytic database was created which included de-identified enrollment  
96 records, administrative claims data for all inpatient and outpatient services, and pharmacy prescriptions,  
97 for commercially insured enrollees from a single national commercial insurer. De-identified HCP  
98 demographic information and professional licensure status was included in an HCP database. ZIP code  
99 level population race and ethnicity data was extracted from the US Census Bureau <sup>15</sup>, socioeconomic  
100 status (SES) Area Deprivation Index (ADI) data, from the University of Wisconsin Neighborhood Atlas <sup>16</sup>,  
101 and household adjusted gross income (AGI) from the Internal Revenue Service.<sup>17</sup>

102

103 A review was performed to assess compliance with de-identification requirements and as it was  
104 determined the data was de-identified or a Limited Data Set in compliance with the Health Insurance  
105 Portability and Accountability Act and customer requirements, the UnitedHealth Group Office of Human  
106 Research Affairs determined that this study was exempt from Institutional Review Board review. The  
107 study was conducted and reported based on the Strengthening the Reporting of Observational Studies  
108 in Epidemiology (STROBE) guidelines.<sup>18</sup> [Supplement 1 – STROBE Checklist]

109

110 The analysis does not include an adjustment for typical confounders such as individual age, sex and co-  
111 morbidities<sup>19,20</sup> using common yet potentially inadequate approaches such as propensity score  
112 matching<sup>21</sup> due to the inability to control for important considerations of individuals with LBP initially  
113 contacting different types of HCP, and subsequent HCPs involved in an episode. Examples of  
114 considerations not available include: HCP options convenient to an individual's home, workplace or daily  
115 travel routes including public transportation if used, individual preference for specific services or type of  
116 HCP including gender or racial concordance, recommendations from family or friends and influence of  
117 HCP marketing efforts, perceived LBP severity, anticipated potential out of pocket costs and willingness  
118 to pay for services, time availability to participate in multiple visits, and appointment availability within  
119 an individual's timing expectations meeting these and other criteria.<sup>22</sup> As an alternative to blurring the  
120 line between association and causality through a process that simultaneously introduces distortion and  
121 complexity into results, actual measures of individual demographic and episodic characteristics, and  
122 unadjusted associations, are reported for each type of HCP seen initially, or subsequently, during an  
123 episode of LBP.

124  
125 To partially address potential confounders, sub analyses were performed for episodes where an  
126 individual initially contacted a PCP, orthopedic surgeon (OS), or EM physician. To examine the influence  
127 of population factors on results, the flow of episodes between types of HCP, and the of % of episodes  
128 where each type of HCP was the last HCP seen were calculated for individuals living in zip codes with 75-  
129 100 ADI and 0-25% non-Hispanic white (NHW) population, 50-75 ADI and 50-75% NHW population, and  
130 0-25 ADI and 75-100% NWH population.

131  
132 *Cohort selection and unit of analysis*

133

134 The cohort included individuals aged 18 years and older with a single complete episode of non-surgical  
135 LBP commencing and ending during the calendar years 2017-2019. This timeframe was selected to  
136 follow the release of the American College of Physicians (ACP) LBP CPG <sup>2</sup> in 2017 and before the  
137 influence of the COVID-19 epidemic on care patterns in early 2020. All individuals had continuous  
138 medical and pharmacy commercial insurance coverage during the entire study period.

139  
140 Episode of care was selected as the unit of analysis. This approach has been shown to be a valid way to  
141 organize all administrative claims data associated with a condition.<sup>23</sup> The *Symmetry*<sup>®</sup> *Episode Treatment*  
142 *Groups*<sup>®</sup> (*ETG*<sup>®</sup>) and *Episode Risk Groups*<sup>®</sup> (*ERG*<sup>®</sup>) version 9.5 methodologies and definitions were used to  
143 translate administrative claims data into episodes of care, which have been reported as a valid  
144 measurement for comparison of HCPs based on cost of care.<sup>24</sup> A previous analysis of the same  
145 underlying data indicates a low risk of misclassification bias associated with using episode of care as the  
146 unit of analysis.<sup>3</sup> Using episode of care unit of measurement has potential translational benefits in  
147 supporting the transition from fee for service to value-based episodic bundled payment arrangements,  
148 something particularly relevant when examining episodes with multiple HCPs involved.

149  
150 The analysis included complete episodes defined as having at least 91-day pre- and 61-day post-episode  
151 clean periods during which no services were provided by any HCP for any LBP diagnosis. LBP episodes  
152 including a surgical procedure, or associated with diagnoses of malignant and non-malignant neoplasms,  
153 fractures and other spinal trauma, infection, congenital deformities and scoliosis, autoimmune  
154 disorders, osteoporosis, and advanced arthritis were excluded from the analysis. Individuals with  
155 multiple LBP episodes during the study period were also excluded. These exclusions were made to  
156 address a potential study limitation of individuals with more complex conditions confounding study



157 results examining the type of HCP initially contacted, and subsequent types of HCP seen during an  
158 episode of LBP.

159

160 *Variables*

161

162 Data preprocessing, table generation, and initial analyses were performed using Python (*Python*  
163 *Language Reference, Version 3.7.5.*, n.d.). To evaluate whether measures were derived from a normally  
164 distributed sample we conducted a goodness-of-fit measure using D'Agostino's K-squared test. Non-  
165 normally distributed data are reported using the median and interquartile range (IQR). Odds (OR) and  
166 risk (RR) ratios, and associated 95% confidence intervals (CI), were calculated for select measures. RR  
167 were reported as this is the measure more widely understood in associational analyses and due to the  
168 tendency for ORs to exaggerate risk in situations where an outcome is relatively common.<sup>25</sup>

169

170 The primary independent variable was 17 types of HCP initially contacted by an individual experiencing a  
171 single episode of non-surgical LBP during the study period. All types of HCP could be accessed directly  
172 without a referral. The primary dependent variables were types of HCP involved after the initial HCP, the  
173 number of days into an episode when subsequent HCP types were involved, the rate of use of 13 types  
174 of health care services and total cost. Service utilization reflects services provided by any type of HCP an  
175 individual saw during the complete episode of LBP. Total cost included costs associated with all services  
176 provided for LBP during an episode, including those not specifically identified in the 13 categories used  
177 in the analyses. Costs for services for which an insurance claim was not submitted were not available.

178

179 With 97.5% of episodes involving five or fewer HCPs, the analyses focused on the first five types of HCP  
180 seen during an episode. This resulted in 1,419,925 possible HCP sequence combinations. [Figure 1] Rate

181 (%) and timing (days), median and IQR, and RR and 95% CI results for cohort demographics, HCP  
182 involvement, episodic service use, and total cost were calculated for all HCP sequence combinations.  
183 Total episode cost and percent of episodes including an MRI or prescription opioid were calculated for  
184 episodes where a PCP, DC, PT or OS was the last HCP seen.

185

## 186 **Results**

187

188 The cohort consisted of 503,958 individuals, associated with 503,958 complete non-surgical LBP  
189 episodes for which 196,522 different HCPs were initially contacted. There were \$387,867,096 in  
190 reimbursed health care expenditures. The median pre- (646 days) and post-episode (405 days) clean  
191 periods were substantially longer than the *ETG*<sup>®</sup> clean period definitions. Primary care physicians (PCP)  
192 (35.2% of episodes), DCs (25.9%), nurse practitioners (7.5%), radiologists (6.0%) and OSs (5.5%) were  
193 the most common types of HCP initially contacted. [Supplement 1] [Supplement 2] There were  
194 potentially meaningful differences in individual and population factors between types of HCP seen at  
195 different points in an episode. [Supplement 3]

196

197 30.2% of episodes involved 2 HCPs, 11.8% involved 3 HCPs, 5.2% involved 4 HCPs and 2.5% of episodes  
198 involved 5 HCPs. All types of HCP were involved in progressively fewer episodes when moving from  
199 initial to second, third, fourth or fifth HCP, except PTs who participated in more episodes as a second  
200 HCP (7,344) than as an initial HCP (5,114). [Table 1]

201

202 When initially contacted by individuals with LBP, and compared to the PCP reference (71.0%), DCs  
203 (84.0%, risk ratio 1.18, 95% confidence interval 1.18-1.19), LAcS (81.7%, 1.15, 1.13-1.17) and DOs  
204 (80.2%, 1.13, 1.08, 1.18) were most likely to be the last and only HCP seen during an episode. [Table 2]

205 [Figure 2] When seen as a second, third or fourth HCP during an episode, DCs and PTs were the only  
206 HCPs more likely than a PCP to be the last HCP seen. Neurosurgeons and radiologists were the least  
207 likely to be the last HCP seen. Sub analyses of the 75-100 ADI 0-25% NHW, 50-75 50-75% NHW, and 0-25  
208 ADI 75-100% NHW segments revealed nearly identical results. [Supplement 4] When the initial HCP  
209 contacted, DCs were more likely than PCPs to be the last HCP seen in each segment. LAcS were more  
210 likely than PCPs to be the last HCP seen in the 75-100 ADI 0-25% NHW and 0-25 ADI 75-100% NHW  
211 segments. [Figure 3] When positioned as the second HCP involved in an episode, DCs were more likely  
212 than PCPs to be the last HCP seen in each segment. PTs were more likely than PCPs to be the last HCP  
213 seen in the 50-75 50-75% NHW and 0-25 ADI 75-100% NHW segments. [Figure 4]

214  
215 The sub-analyses of individuals initially contacting a PCP, OS, or EM had similar last HCP seen results. For  
216 individuals initially contacting a PCP, and when seen as a second HCP, DCs (76.2%, risk ratio 1.15, 95%  
217 confidence interval 1.13-1.18) and PTs (76.1%, 1.15, 1.12-1.18) were the most likely to be the last only  
218 HCP seen. For individuals initially contacting an OS, and when seen as a second HCP, DCs (69.5%, 1.12,  
219 1.05-1.19) and PTs (71.2%, 1.14, 1.09-1.20) were the most likely to be the last only HCP seen. For  
220 individuals initially contacting EM, and when seen as a second HCP DCs (76.5%, 1.12, 1.05-1.20) were  
221 the most likely to be the last only HCP seen. [Figure 5] This was also the case when a DC or PT was the  
222 third or fourth provider seen for individuals initially contacting a PCP. DCs and PTs were also the most  
223 likely to be the last HCP seen when the second, third or fourth HCP for individuals initially contacting an  
224 OS or EM. [Table 3]

225  
226 Whether seen as the initial, second, third or fourth HCP, when the last HCP seen during an episode the  
227 rate of MRI and opioid exposure progressively increased the later in an episode a PCP, DC, PT or OS  
228 became involved. Compared to both PCPs and OSs, DCs and PTs were associated with a lower rate of

229 opioid exposure at any time during an episode. DCs were associated with a lower rate of MRI exposure  
230 than PCPs, PTs, or OSs. [Figure 6] Similarly, when the last HCP seen, total episode cost progressively  
231 increased later in an episode a PCP, DC, PT or OS became involved. When the last HCP seen, PCPs and  
232 DCs were associated with lower median total episode cost with PTs and OSs associated with higher  
233 median total episode cost. [Figure 7] [Table 4]

234

## 235 **Discussion**

236

237 As a novel measure with many potential confounders and in the absence of clinical outcomes data it is  
238 important not to over interpret the finding that non-prescribing HCPs, particularly DCs and PTs, are most  
239 likely to be the last HCP seen for an episode of LBP. When coupled with the growing body of evidence  
240 demonstrating high levels of CPG concordance when these same types of HCP are initially contacted by  
241 individuals with LBP, additional exploration of attributes of the last HCP seen is warranted to more  
242 thoroughly understand the role these types of HCP play in managing LBP. While non-prescribing HCPs  
243 are most likely to be the last HCP seen for an episode of LBP, the rate of use of second- and third-line  
244 services and total episode cost increases the later non-prescribing HCPs are involved in an episode. This  
245 may provide additional support for positioning non-prescribing HCPs early in an episode of LBP as a  
246 strategy for improving CPG concordance and value.

247

248 This study has several limitations including its retrospective design and those associated with the use of  
249 administrative databases. The cohort had continuous highly uniform commercial insurance coverage  
250 and the processing of administrative claims data included extensive quality and actuarial control  
251 measures, nonetheless, data errors, variability in benefit plan design, variability in enrollee cost-sharing  
252 responsibility, and missing information were potential sources of confounding or bias. Although the

253 commercial insurer HCP database is under continual validation it may have included errors or missing  
254 information. Summarizing total episode cost has potential limitations associated with insurance  
255 coverage, nature of network participation, and alternative reimbursement models. While individuals  
256 from all 50 states and most US territories were included, providing a measure of generalizability, the  
257 cohort did not describe a U.S representative sample.

258  
259 Another important limitation was the risk of confounding and bias associated with the limited ability to  
260 control for individual preference for types of HCP seen during an episode of LBP, individual expectations,  
261 or requests for specific health care services, and potentially meaningful differences in clinical complexity  
262 of individuals contacting or being referred to different types of HCP. This limitation was partially  
263 addressed by narrowing the study population with several exclusions. The study excluded LBP  
264 associated with serious pathology, individuals with multiple episodes of LBP, and episodes involving a  
265 surgical procedure. Sub analyses were conducted to provide insight into to the degree to which  
266 individual and population factors may have influenced results.

267  
268 While this study focused on individuals with a single episode of LBP, without the availability of clinical  
269 outcomes or patient self-report data, the last HCP seen cannot be assumed to be associated with, or a  
270 proxy for, resolution of LBP. Individuals may have been dissatisfied with care and discontinued all  
271 treatment, may have paid for additional treatment on a self-pay basis, or elected to pursue self-  
272 management. With the cohort having continuous insurance coverage during the study period and a  
273 median post-episode clean period of 401 days (Q1 248, Q3 638, minimum 61) during which there was no  
274 treatment of any type for LBP, it is highly unlikely that after the last HCP seen there was a worsening of  
275 LBP symptoms. In future analyses, expanding the cohort to include individuals with multiple episodes of  
276 LBP will be important.

277

278 The volume of data involved in exploring associations in the 1.4 million possible HCP combinations  
279 presented another limitation. This will be addressed through subsequent analyses of cohort  
280 characteristics and differing rates of exposure to the types of health care services.

281

282 With this study of the last HCP seen for LBP being novel, it is challenging to corroborate previous studies.

283 When involved in an episode of LBP as either the initial or subsequent HCP, the finding that DCs are  
284 more likely to be the last HCP seen, and associated with the lowest total cost, of any type of HCP is

285 consistent with DCs emphasis on CPG concordant non-pharmaceutical and non-interventional services.<sup>3</sup>

286 The finding that PTs, are more frequently contacted as a second HCP than as an initial HCP is consistent  
287 with PTs historically being positioned as referral recipients rather than initial contact HCPs.<sup>26,27</sup> When

288 contacted as a second, third or fourth HCP PTs are as likely as a DC to be the last HCP seen which makes  
289 sense given the similar emphasis on CPG recommended first-line services.<sup>3</sup> The finding of PTs being

290 infrequently contacted as the initial HCP is consistent with a previous study<sup>3</sup>, however when contacted

291 as the initial HCP, PTs are less likely than PCPs to be the last HCP seen which indicates the potential for  
292 less practice autonomy than DCs and warrants further study. A possible interpretation of these findings

293 is that DCs and PTs possess similar knowledge, skills and training to effectively resolve LBP, with DCs

294 positioned as portal of entry autonomous HCPs and PTs positioned as a referral recipient from and  
295 referral source to other types of HCPs.

296

## 297 **Conclusions**

298

299 The last HCP seen by an individual with LBP is a novel area of investigation and further exploration is  
300 warranted to understand whether this study's findings can be replicated and whether the approach

301 provides meaningful insights into the types of HCP that are most helpful in resolving LBP. Whether seen  
302 initially, or later in an episode, DCs are most likely to be the last HCP seen by an individual with LBP. PTs  
303 are similar, except when they are the initial HCP contacted by an individual with LBP. While DCs and PTs  
304 are most likely to be the last HCP seen during an episode of LBP the later in an episode a DC or PT is seen  
305 associated beneficial attributes such as opioid avoidance are lost, and total episode cost increases. This  
306 adds additional support to the growing body of literature advocating for positioning these types of HCPs  
307 earlier in an episode of LBP.

## 308 References

- 309 1. Meroni R, Piscitelli D, Ravasio C, et al. Evidence for managing chronic low back pain in primary  
310 care: a review of recommendations from high-quality clinical practice guidelines. *Disabil Rehabil.* Apr  
311 2021;43(7):1029-1043. doi:10.1080/09638288.2019.1645888
- 312 2. Qaseem A, Wilt TJ, McLean RM, et al. Noninvasive Treatments for Acute, Subacute, and Chronic  
313 Low Back Pain: A Clinical Practice Guideline From the American College of Physicians. *Ann Intern Med.*  
314 Apr 4 2017;166(7):514-530. doi:10.7326/M16-2367
- 315 3. Elton D, Kosloff TM, Zhang M, et al. Low back pain care pathways and costs: association with the  
316 type of initial contact health care provider. A retrospective cohort study. *medRxiv.*  
317 2022:2022.06.17.22276443. doi:10.1101/2022.06.17.22276443
- 318 4. Fritz JM, Kim J, Dorius J. Importance of the type of provider seen to begin health care for a new  
319 episode low back pain: associations with future utilization and costs. *Journal of Evaluation in Clinical*  
320 *Practice.* 2016;22(2):247-252. doi:<https://doi.org/10.1111/jep.12464>
- 321 5. Frogner BK, Harwood K, Andrilla CHA, Schwartz M, Pines JM. Physical Therapy as the First Point  
322 of Care to Treat Low Back Pain: An Instrumental Variables Approach to Estimate Impact on Opioid  
323 Prescription, Health Care Utilization, and Costs. *Health Services Research.* 2018;53(6):4629-4646.  
324 doi:<https://doi.org/10.1111/1475-6773.12984>
- 325 6. Harwood KJ, Pines JM, Andrilla CHA, Frogner BK. Where to start? A two stage residual inclusion  
326 approach to estimating influence of the initial provider on health care utilization and costs for low back  
327 pain in the US. *BMC Health Serv Res.* May 23 2022;22(1):694. doi:10.1186/s12913-022-08092-1
- 328 7. Kazis LE, Ameli O, Rothendler J, et al. Observational retrospective study of the association of  
329 initial healthcare provider for new-onset low back pain with early and long-term opioid use. *BMJ Open.*  
330 Sep 20 2019;9(9):e028633. doi:10.1136/bmjopen-2018-028633
- 331 8. Liu X, Hanney WJ, Masaracchio M, et al. Immediate Physical Therapy Initiation in Patients With  
332 Acute Low Back Pain Is Associated With a Reduction in Downstream Health Care Utilization and Costs.  
333 *Physical Therapy.* 2018;98(5):336-347. doi:10.1093/ptj/pzy023
- 334 9. Murphy C, French H, McCarthy G, Cunningham C. Clinical pathways for the management of low  
335 back pain from primary to specialised care: a systematic review. *Eur Spine J.* Jul 2022;31(7):1846-1865.  
336 doi:10.1007/s00586-022-07180-4
- 337 10. Coeckelberghs E, Verbeke H, Desomer A, et al. International comparative study of low back pain  
338 care pathways and analysis of key interventions. *Eur Spine J.* Apr 2021;30(4):1043-1052.  
339 doi:10.1007/s00586-020-06675-2
- 340 11. Magel J, Hansen P, Meier W, et al. Implementation of an Alternative Pathway for Patients  
341 Seeking Care for Low Back Pain: A Prospective Observational Cohort Study. *Phys Ther.* Dec 1  
342 2018;98(12):1000-1009. doi:10.1093/ptj/pzy105
- 343 12. Magel J, Suslavich K, Roper K, Fritz J, Madsen T. Emergency department evaluation, treatment,  
344 and functional outcomes among patients presenting with low back pain. *Am J Emerg Med.* Sep  
345 2022;59:37-41. doi:10.1016/j.ajem.2022.06.048
- 346 13. Davidson SR, Bolsewicz K, Kamper SJ, et al. Perspectives of emergency department clinicians on  
347 the challenges of addressing low back pain in the emergency setting: A qualitative study. *Emerg Med*  
348 *Australas.* Apr 2022;34(2):199-208. doi:10.1111/1742-6723.13854
- 349 14. Ojha HA, Wyrsta NJ, Davenport TE, Egan WE, Gellhorn AC. Timing of Physical Therapy Initiation  
350 for Nonsurgical Management of Musculoskeletal Disorders and Effects on Patient Outcomes: A  
351 Systematic Review. *J Orthop Sports Phys Ther.* Feb 2016;46(2):56-70. doi:10.2519/jospt.2016.6138



- 352 15. Bureau USC. ACS Demographic and Housing Estimates. Accessed July 8, 2020.  
353 <https://data.census.gov/cedsci/table?q=United%20States&g=0100000US&y=2018&tid=ACSDP1Y2018.D>  
354 [P05&hidePreview=true](https://data.census.gov/cedsci/table?q=United%20States&g=0100000US&y=2018&tid=ACSDP1Y2018.D).
- 355 16. Kind AJH, Buckingham WR. Making Neighborhood-Disadvantage Metrics Accessible - The  
356 Neighborhood Atlas. *N Engl J Med*. Jun 28 2018;378(26):2456-2458. doi:10.1056/NEJMp1802313
- 357 17. Service IR. US Department of Treasury SOI tax stats - individual income tax statistics - 2017 ZIP  
358 code data. Accessed July 20, 2020. [https://www.irs.gov/statistics/soi-tax-stats-individual-income-tax-](https://www.irs.gov/statistics/soi-tax-stats-individual-income-tax-statistics-2017-zip-code-data-soi)  
359 [statistics-2017-zip-code-data-soi](https://www.irs.gov/statistics/soi-tax-stats-individual-income-tax-statistics-2017-zip-code-data-soi).
- 360 18. von Elm E, Altman DG, Egger M, et al. The Strengthening the Reporting of Observational Studies  
361 in Epidemiology (STROBE) Statement: guidelines for reporting observational studies. *Int J Surg*. Dec  
362 2014;12(12):1495-9. doi:10.1016/j.ijsu.2014.07.013
- 363 19. Hernan MA. The C-Word: Scientific Euphemisms Do Not Improve Causal Inference From  
364 Observational Data. *Am J Public Health*. May 2018;108(5):616-619. doi:10.2105/AJPH.2018.304337
- 365 20. Smith GD, Ebrahim S. Data dredging, bias, or confounding. *BMJ*. Dec 21 2002;325(7378):1437-8.  
366 doi:10.1136/bmj.325.7378.1437
- 367 21. King G NR. Why Propensity Scores Should Not Be Used for Matching. *Political Analysis*.  
368 2019;27(4):435-454. doi:10.1017/pan.2019.11
- 369 22. National Academies of Sciences E, and Medicine. *Health-Care Utilization as a Proxy in Disability*  
370 *Determination*. 2 Factors That Affect Health-Care Utilization. National Academies Press 2018.
- 371 23. Peterson C, Grosse SD, Dunn A. A practical guide to episode groupers for cost-of-illness analysis  
372 in health services research. *SAGE Open Med*. 2019;7:2050312119840200.  
373 doi:10.1177/2050312119840200
- 374 24. Insight O. Symmetry episode treatment groups: measuring health care with meaningful episodes  
375 of care. 2012.
- 376 25. Viera AJ. Odds ratios and risk ratios: what's the difference and why does it matter? *South Med J*.  
377 Jul 2008;101(7):730-4. doi:10.1097/SMJ.0b013e31817a7ee4
- 378 26. Clark B, Clark L, Showalter C, Stoner T. A call to action: direct access to physical therapy is highly  
379 successful in the US military. When will professional bodies, legislatures, and payors provide the same  
380 advantages to all US civilian physical therapists? *J Man Manip Ther*. Aug 2022;30(4):199-206.  
381 doi:10.1080/10669817.2022.2099893
- 382 27. Hon S, Ritter R, Allen DD. Cost-Effectiveness and Outcomes of Direct Access to Physical Therapy  
383 for Musculoskeletal Disorders Compared to Physician-First Access in the United States: Systematic  
384 Review and Meta-Analysis. *Phys Ther*. Jan 4 2021;101(1)doi:10.1093/ptj/pzaa201

385

386 **List of Abbreviations:**

387 LBP – Low back pain

388 US – United States

389 CPG – Clinical practice guideline

390 PCP – Primary care provider

391 DC – Doctor of Chiropractic

392 PT – Physical Therapist

393 LAc – Licensed acupuncturist

394 HCP – Health care provider

395 ADI – Area Deprivation Index

396 WTP – Willingness to pay

397 STROBE – Strengthening the Reporting of Observational Studies in Epidemiology

398 ETG<sup>®</sup> – Episode Treatment Group<sup>®</sup>

399 ERG<sup>®</sup> – Episode Risk Group<sup>®</sup>

400 ACP – American College of Physicians

401 RR – Risk ratio

402 OR – Odds ratio

403 CI – Confidence interval

404 CMT – Chiropractic manipulative treatment

405 AC – Active care

406 MT – Manual therapy

Table 1 - Non-surgical low back pain episode count by type of health care provider (HCP) and episode sequence position

| HCP type               |        | # of Unique HCPs |            |           |            |           | # of Episodes |            |           |            |           | % of Episodes |            |           |            |           |
|------------------------|--------|------------------|------------|-----------|------------|-----------|---------------|------------|-----------|------------|-----------|---------------|------------|-----------|------------|-----------|
|                        |        | First HCP        | Second HCP | Third HCP | Fourth HCP | Fifth HCP | First HCP     | Second HCP | Third HCP | Fourth HCP | Fifth HCP | First HCP     | Second HCP | Third HCP | Fourth HCP | Fifth HCP |
| Primary Care           | PCP    | 68888            | 28730      | 11787     | 4889       | 2301      | 177265        | 40767      | 13766     | 5239       | 2364      | 35.2%         | 26.8%      | 23.2%     | 20.0%      | 18.5%     |
|                        | Nurse  | 21226            | 9897       | 4101      | 1919       | 1049      | 37857         | 12820      | 4749      | 2108       | 1031      | 7.5%          | 8.4%       | 8.0%      | 8.0%       | 8.1%      |
|                        | PA     | 12787            | 6746       | 2955      | 1373       | 781       | 25350         | 9418       | 3542      | 1545       | 718       | 5.0%          | 6.2%       | 6.0%      | 5.9%       | 5.6%      |
|                        | DO     | 121              | 45         | 30        | 9          | 7         | 469           | 64         | 42        | 11         | 10        | 0.1%          | 0.0%       | 0.1%      | 0.0%       | 0.1%      |
| Non-Prescriber         | DC     | 21644            | 9953       | 4396      | 1735       | 739       | 130520        | 18586      | 5823      | 2011       | 797       | 25.9%         | 12.2%      | 9.8%      | 7.7%       | 6.2%      |
|                        | PT     | 3019             | 4143       | 2769      | 1601       | 776       | 5114          | 7344       | 4076      | 2077       | 1135      | 1.0%          | 4.8%       | 6.9%      | 7.9%       | 8.9%      |
|                        | LAc    | 1430             | 397        | 159       | 67         | 36        | 2634          | 486        | 175       | 73         | 30        | 0.5%          | 0.3%       | 0.3%      | 0.3%       | 0.2%      |
| Specialist             | OS     | 8590             | 5241       | 3048      | 1740       | 1120      | 27799         | 10867      | 4971      | 2362       | 1152      | 5.5%          | 7.1%       | 8.4%      | 9.0%       | 9.0%      |
|                        | PMR    | 2966             | 2127       | 1622      | 1120       | 767       | 12496         | 5501       | 3236      | 1817       | 1009      | 2.5%          | 3.6%       | 5.5%      | 6.9%       | 7.9%      |
|                        | PM     | 2497             | 1888       | 1561      | 1126       | 782       | 9013          | 4280       | 2884      | 1757       | 1031      | 1.8%          | 2.8%       | 4.9%      | 6.7%       | 8.1%      |
|                        | NS     | 1373             | 1164       | 894       | 650        | 441       | 3058          | 2084       | 1322      | 817        | 432       | 0.6%          | 1.4%       | 2.2%      | 3.1%       | 3.4%      |
|                        | Neuro  | 2352             | 1321       | 709       | 371        | 194       | 3917          | 1729       | 843       | 410        | 224       | 0.8%          | 1.1%       | 1.4%      | 1.6%       | 1.8%      |
|                        | Rheum  | 1642             | 998        | 558       | 304        | 158       | 3354          | 1463       | 667       | 332        | 166       | 0.7%          | 1.0%       | 1.1%      | 1.3%       | 1.3%      |
|                        | MD Oth | 9230             | 5122       | 2332      | 1259       | 723       | 13877         | 6716       | 2963      | 1539       | 840       | 2.8%          | 4.4%       | 5.0%      | 5.9%       | 6.6%      |
| Emergency /Urgent Care | EM     | 8365             | 3658       | 1313      | 511        | 301       | 15760         | 4838       | 1463      | 544        | 233       | 3.1%          | 3.2%       | 2.5%      | 2.1%       | 1.8%      |
|                        | Rad    | 10098            | 8613       | 4763      | 2468       | 2039      | 30393         | 23828      | 8454      | 3475       | 1551      | 6.0%          | 15.7%      | 14.3%     | 13.3%      | 12.2%     |
|                        | UC     | 1120             | 517        | 186       | 73         | 43        | 5082          | 1358       | 272       | 87         | 39        | 1.0%          | 0.9%       | 0.5%      | 0.3%       | 0.3%      |
| Total                  |        | 177348           | 90560      | 43183     | 21215      | 12257     | 503958        | 152149     | 59248     | 26204      | 12762     | 100.0%        | 100.0%     | 100.0%    | 100.0%     | 100.0%    |
| % of Total Episodes    |        |                  |            |           |            |           |               |            |           |            |           | 100.0%        | 30.2%      | 11.8%     | 5.2%       | 2.5%      |

PCP=primary care provider, DO=doctor of osteopathy, DC=doctor of chiropractic, PT=physical therapist, LAc=licensed acupuncturist, OS=orthopedic surgeon, PMR=physical medicine & rehabilitation, PM=pain medicine, NS=neurosurgeon, Neuro=neurologist, Rheum=rheumatologist, MD Oth = other medical physician, EM=emergency medicine, Rad=radiologist, UC=urgent care

Table 2 - % of non-surgical low back pain episodes where health care provider (HCP) type was the last HCP seen

| HCP type               |        | % where no follow-up HCP |                 |                 |                 | Risk Ratio and 95% confidence interval compared to PCP |                          |                          |                          |
|------------------------|--------|--------------------------|-----------------|-----------------|-----------------|--------------------------------------------------------|--------------------------|--------------------------|--------------------------|
|                        |        | First No Second          | Second No Third | Third No Fourth | Fourth No Fifth | First No Second                                        | Second No Third          | Third No Fourth          | Fourth No Fifth          |
| Primary Care           | PCP    | 71.0%                    | 65.9%           | 61.4%           | 54.7%           | Reference                                              |                          |                          |                          |
|                        | Nurse  | 62.1%                    | 60.2%           | 53.4%           | 48.3%           | 0.87 (0.87, 0.88)                                      | 0.91 (0.90, 0.93)        | 0.87 (0.84, 0.90)        | 0.88 (0.84, 0.93)        |
|                        | PA     | 58.8%                    | 56.4%           | 51.8%           | 47.5%           | 0.83 (0.82, 0.84)                                      | 0.86 (0.84, 0.87)        | 0.84 (0.81, 0.87)        | 0.87 (0.82, 0.92)        |
|                        | DO     | 80.2%                    | 64.1%           | 66.7%           | 36.4%           | <b>1.13 (1.08, 1.18)</b>                               | <b>0.97 (0.81, 1.17)</b> | <b>1.09 (0.88, 1.35)</b> | <b>0.67 (0.30, 1.45)</b> |
| Non-Prescriber         | DC     | 84.0%                    | 72.7%           | 67.7%           | 61.6%           | <b>1.18 (1.18, 1.19)</b>                               | <b>1.10 (1.09, 1.12)</b> | <b>1.10 (1.08, 1.13)</b> | <b>1.13 (1.08, 1.17)</b> |
|                        | PT     | 60.0%                    | 70.9%           | 63.2%           | 60.7%           | 0.84 (0.83, 0.86)                                      | <b>1.08 (1.06, 1.09)</b> | <b>1.03 (1.00, 1.06)</b> | <b>1.11 (1.06, 1.16)</b> |
|                        | LAc    | 81.7%                    | 62.3%           | 62.9%           | 50.7%           | <b>1.15 (1.13, 1.17)</b>                               | <b>0.95 (0.88, 1.01)</b> | <b>1.02 (0.91, 1.15)</b> | <b>0.93 (0.74, 1.16)</b> |
| Specialist             | OS     | 63.2%                    | 56.8%           | 52.8%           | 49.8%           | 0.89 (0.88, 0.90)                                      | 0.86 (0.85, 0.88)        | 0.86 (0.83, 0.88)        | 0.91 (0.87, 0.95)        |
|                        | PMR    | 64.0%                    | 58.5%           | 56.5%           | 55.7%           | 0.90 (0.89, 0.91)                                      | 0.89 (0.87, 0.91)        | 0.92 (0.89, 0.95)        | <b>1.02 (0.97, 1.07)</b> |
|                        | PM     | 61.5%                    | 54.7%           | 55.3%           | 52.9%           | 0.87 (0.85, 0.88)                                      | 0.83 (0.81, 0.85)        | 0.90 (0.87, 0.93)        | <b>0.97 (0.92, 1.02)</b> |
|                        | NS     | 51.6%                    | 47.6%           | 43.9%           | 45.4%           | 0.73 (0.70, 0.75)                                      | 0.72 (0.69, 0.76)        | 0.71 (0.67, 0.76)        | 0.83 (0.77, 0.90)        |
|                        | Neuro  | 57.1%                    | 56.6%           | 55.2%           | 51.7%           | 0.80 (0.78, 0.83)                                      | 0.86 (0.82, 0.90)        | 0.90 (0.84, 0.96)        | <b>0.95 (0.86, 1.04)</b> |
|                        | Rheum  | 62.0%                    | 57.8%           | 54.1%           | 52.1%           | 0.87 (0.85, 0.90)                                      | 0.88 (0.84, 0.92)        | 0.88 (0.82, 0.95)        | <b>0.95 (0.86, 1.06)</b> |
| Emergency /Urgent Care | MD Oth | 55.9%                    | 59.8%           | 55.3%           | 52.0%           | 0.79 (0.78, 0.80)                                      | 0.91 (0.89, 0.93)        | 0.90 (0.87, 0.93)        | <b>0.95 (0.90, 1.00)</b> |
|                        | EM     | 60.4%                    | 56.0%           | 52.4%           | 43.2%           | 0.85 (0.84, 0.86)                                      | 0.85 (0.83, 0.87)        | 0.85 (0.81, 0.90)        | 0.79 (0.72, 0.87)        |
|                        | Rad    | 49.0%                    | 49.5%           | 42.0%           | 38.3%           | 0.69 (0.68, 0.70)                                      | 0.75 (0.74, 0.76)        | 0.68 (0.67, 0.70)        | 0.70 (0.67, 0.74)        |
|                        | UC     | 62.6%                    | 65.3%           | 55.5%           | 50.6%           | 0.88 (0.86, 0.90)                                      | <b>0.99 (0.95, 1.03)</b> | <b>0.90 (0.81, 1.01)</b> | <b>0.93 (0.75, 1.14)</b> |

Cells in red have risk ratio 95% confidence interval crossing the PCP reference of 1

Cells highlighted with bold font have at least 20 episodes and risk ratio 95% plus confidence interval greater than the PCP reference of 1 indicating greater likelihood to be the last HCP seen

PCP=primary care provider, DO=doctor of osteopathy, DC=doctor of chiropractic, PT=physical therapist, LAc=licensed acupuncturist, OS=orthopedic surgeon, PMR=physical medicine & rehabilitation, PM=pain medicine, NS=neurosurgeon, Neuro=neurologist, Rheum=rheumatologist, MD Oth = other medical physician, EM=emergency medicine, Rad=radiologist, UC=urgent care

Table 3 - Non-surgical low back pain episodes initially contacting a primary care provider (PCP), orthopedic surgeon (OS) or emergency medicine physician (EM), subsequent health care providers (HCP) seen, and % of episodes where the subsequent HCP was the last HCP seen

|        | Initial HCP Contacted For First Episode - PCP |        |           |        |            |        | Initial HCP Contacted For First Episode - OS |        |           |        |            |        | Initial HCP Contacted For First Episode - EM |        |           |        |            |        |
|--------|-----------------------------------------------|--------|-----------|--------|------------|--------|----------------------------------------------|--------|-----------|--------|------------|--------|----------------------------------------------|--------|-----------|--------|------------|--------|
|        | Second HCP                                    |        | Third HCP |        | Fourth HCP |        | Second HCP                                   |        | Third HCP |        | Fourth HCP |        | Second HCP                                   |        | Third HCP |        | Fourth HCP |        |
|        | Episodes                                      | No 3rd | Episodes  | No 4th | Episodes   | No 5th | Episodes                                     | No 3rd | Episodes  | No 4th | Episodes   | No 5th | Episodes                                     | No 3rd | Episodes  | No 4th | Episodes   | No 5th |
| PCP    | 11709                                         | 66.1%  | 6762      | 63.4%  | 2055       | 53.7%  | 1645                                         | 62.2%  | 564       | 52.3%  | 232        | 48.3%  | 1614                                         | 68.4%  | 571       | 66.7%  | 256        | 56.2%  |
| Nurse  | 4787                                          | 62.3%  | 1147      | 52.5%  | 570        | 50.9%  | 441                                          | 51.0%  | 168       | 50.0%  | 81         | 43.2%  | 541                                          | 65.1%  | 199       | 60.8%  | 72         | 41.7%  |
| PA     | 3340                                          | 60.7%  | 933       | 49.8%  | 456        | 45.0%  | 755                                          | 48.6%  | 187       | 49.7%  | 104        | 44.2%  | 541                                          | 59.9%  | 166       | 54.8%  | 66         | 59.1%  |
| DO     | 16                                            | 68.8%  | 9         | 100.0% | 1          | 100.0% | 6                                            | 83.3%  | 3         | 0.0%   | 0          |        | 3                                            | 100.0% | 3         | 66.7%  | 1          | 100.0% |
| DC     | 6824                                          | 76.2%  | 1189      | 69.6%  | 529        | 62.2%  | 699                                          | 69.5%  | 200       | 64.5%  | 98         | 54.1%  | 362                                          | 76.5%  | 132       | 73.5%  | 51         | 64.7%  |
| PT     | 2660                                          | 76.1%  | 1270      | 65.2%  | 683        | 61.1%  | 1573                                         | 71.2%  | 491       | 62.3%  | 238        | 63.9%  | 78                                           | 62.8%  | 113       | 70.8%  | 56         | 71.4%  |
| LAc    | 128                                           | 69.5%  | 49        | 51.0%  | 6          | 66.7%  | 18                                           | 66.7%  | 4         | 75.0%  | 4          | 100.0% | 11                                           | 45.5%  | 6         | 50.0%  | 3          | 33.3%  |
| OS     | 3589                                          | 57.7%  | 1329      | 52.7%  | 689        | 50.2%  | 1148                                         | 54.1%  | 1273      | 54.2%  | 437        | 51.3%  | 274                                          | 60.9%  | 164       | 62.2%  | 80         | 57.5%  |
| PMR    | 1772                                          | 60.4%  | 836       | 53.9%  | 553        | 50.8%  | 564                                          | 60.6%  | 258       | 59.3%  | 155        | 56.1%  | 126                                          | 65.1%  | 93        | 58.1%  | 43         | 65.1%  |
| PM     | 1293                                          | 59.7%  | 604       | 57.5%  | 446        | 59.4%  | 400                                          | 60.5%  | 194       | 60.3%  | 160        | 56.2%  | 62                                           | 58.1%  | 40        | 57.5%  | 31         | 54.8%  |
| NS     | 701                                           | 48.1%  | 437       | 43.9%  | 272        | 44.1%  | 99                                           | 45.5%  | 67        | 41.8%  | 42         | 57.1%  | 63                                           | 58.7%  | 49        | 51.0%  | 38         | 50.0%  |
| Neuro  | 580                                           | 58.4%  | 221       | 55.2%  | 144        | 44.4%  | 138                                          | 53.6%  | 51        | 31.4%  | 23         | 60.9%  | 31                                           | 61.3%  | 22        | 54.5%  | 7          | 57.1%  |
| Rheum  | 471                                           | 56.9%  | 151       | 57.6%  | 74         | 55.4%  | 90                                           | 55.6%  | 39        | 66.7%  | 23         | 47.8%  | 20                                           | 50.0%  | 7         | 42.9%  | 7          | 71.4%  |
| MD Oth | 2009                                          | 63.4%  | 753       | 56.0%  | 396        | 54.5%  | 487                                          | 60.4%  | 206       | 58.7%  | 120        | 46.7%  | 317                                          | 64.0%  | 98        | 58.2%  | 46         | 47.8%  |
| EM     | 1224                                          | 53.1%  | 433       | 49.9%  | 175        | 40.0%  | 109                                          | 53.2%  | 38        | 60.5%  | 27         | 37.0%  | 535                                          | 56.6%  | 284       | 58.1%  | 70         | 54.3%  |
| Rad    | 9814                                          | 52.8%  | 2863      | 41.5%  | 1188       | 40.1%  | 2039                                         | 47.4%  | 538       | 42.9%  | 221        | 35.3%  | 1606                                         | 51.6%  | 442       | 43.2%  | 159        | 34.6%  |
| UC     | 555                                           | 66.3%  | 88        | 50.0%  | 22         | 45.5%  | 20                                           | 45.0%  | 10        | 70.0%  | 4          | 75.0%  | 58                                           | 58.6%  | 19        | 47.4%  | 6          | 33.3%  |

Risk ratio and 95% confidence interval compared to the PCP reference

|        | 1                        |                          |                          | 1                        |                          |                          | 1                        |                          |                          |
|--------|--------------------------|--------------------------|--------------------------|--------------------------|--------------------------|--------------------------|--------------------------|--------------------------|--------------------------|
| PCP    |                          |                          |                          |                          |                          |                          |                          |                          |                          |
| Nurse  | 0.94 (0.92, 0.97)        | 0.83 (0.78, 0.88)        | <b>0.95 (0.87, 1.04)</b> | 0.82 (0.74, 0.90)        | <b>0.96 (0.81, 1.13)</b> | <b>0.90 (0.67, 1.19)</b> | <b>0.95 (0.89, 1.02)</b> | <b>0.91 (0.80, 1.03)</b> | 0.74 (0.55, 0.99)        |
| PA     | 0.92 (0.89, 0.95)        | 0.79 (0.73, 0.84)        | 0.84 (0.75, 0.93)        | 0.78 (0.72, 0.85)        | <b>0.95 (0.81, 1.12)</b> | <b>0.92 (0.71, 1.18)</b> | 0.88 (0.81, 0.95)        | 0.82 (0.71, 0.95)        | <b>1.05 (0.84, 1.32)</b> |
| DO     | <b>1.04 (0.75, 1.45)</b> | 1.58 (1.55, 1.61)        | 1.86 (1.79, 1.94)        | <b>1.34 (0.93, 1.92)</b> | N/A                      | N/A                      | 1.46 (1.41, 1.51)        | <b>1.00 (0.45, 2.23)</b> | 1.78 (1.60, 1.98)        |
| DC     | <b>1.15 (1.13, 1.18)</b> | <b>1.10 (1.05, 1.14)</b> | <b>1.16 (1.07, 1.25)</b> | <b>1.12 (1.05, 1.19)</b> | <b>1.23 (1.08, 1.40)</b> | <b>1.12 (0.89, 1.40)</b> | <b>1.12 (1.05, 1.20)</b> | <b>1.10 (0.98, 1.24)</b> | <b>1.15 (0.91, 1.45)</b> |
| PT     | <b>1.15 (1.12, 1.18)</b> | <b>1.03 (0.98, 1.07)</b> | <b>1.14 (1.06, 1.22)</b> | <b>1.14 (1.09, 1.20)</b> | <b>1.19 (1.07, 1.32)</b> | <b>1.32 (1.12, 1.56)</b> | <b>0.92 (0.77, 1.09)</b> | <b>1.06 (0.93, 1.21)</b> | <b>1.27 (1.04, 1.55)</b> |
| LAc    | <b>1.05 (0.94, 1.18)</b> | <b>0.80 (0.61, 1.06)</b> | <b>1.24 (0.70, 2.19)</b> | <b>1.07 (0.77, 1.49)</b> | <b>1.43 (0.81, 2.54)</b> | 2.07 (1.81, 2.37)        | <b>0.66 (0.35, 1.27)</b> | <b>0.75 (0.34, 1.67)</b> | <b>0.59 (0.12, 2.95)</b> |
| OS     | 0.87 (0.85, 0.90)        | 0.83 (0.79, 0.88)        | <b>0.94 (0.86, 1.02)</b> | 0.87 (0.81, 0.93)        | <b>1.04 (0.94, 1.14)</b> | <b>1.06 (0.90, 1.25)</b> | 0.89 (0.81, 0.99)        | <b>0.93 (0.82, 1.06)</b> | <b>1.02 (0.82, 1.27)</b> |
| PMR    | 0.91 (0.88, 0.95)        | 0.85 (0.80, 0.91)        | <b>0.95 (0.86, 1.04)</b> | <b>0.97 (0.90, 1.05)</b> | <b>1.13 (1.00, 1.29)</b> | <b>1.16 (0.96, 1.41)</b> | <b>0.95 (0.83, 1.09)</b> | <b>0.87 (0.73, 1.04)</b> | <b>1.16 (0.91, 1.48)</b> |
| PM     | 0.90 (0.86, 0.95)        | 0.91 (0.84, 0.97)        | <b>1.11 (1.02, 1.21)</b> | <b>0.97 (0.89, 1.06)</b> | <b>1.15 (1.00, 1.32)</b> | <b>1.17 (0.96, 1.41)</b> | <b>0.85 (0.69, 1.05)</b> | <b>0.86 (0.66, 1.13)</b> | <b>0.97 (0.70, 1.37)</b> |
| NS     | 0.73 (0.67, 0.79)        | 0.69 (0.62, 0.77)        | 0.82 (0.71, 0.95)        | 0.73 (0.59, 0.91)        | <b>0.80 (0.60, 1.07)</b> | <b>1.18 (0.88, 1.59)</b> | <b>0.86 (0.70, 1.06)</b> | <b>0.76 (0.58, 1.01)</b> | <b>0.89 (0.64, 1.24)</b> |
| Neuro  | 0.88 (0.83, 0.95)        | 0.87 (0.77, 0.98)        | 0.83 (0.69, 1.00)        | <b>0.86 (0.73, 1.01)</b> | 0.60 (0.40, 0.91)        | <b>1.26 (0.89, 1.80)</b> | <b>0.90 (0.68, 1.19)</b> | <b>0.82 (0.56, 1.20)</b> | <b>1.02 (0.53, 1.95)</b> |
| Rheum  | <b>0.86 (0.80, 0.93)</b> | <b>0.93 (0.82, 1.04)</b> | <b>0.96 (0.84, 1.07)</b> | <b>0.86 (0.73, 1.01)</b> | <b>0.60 (0.40, 0.91)</b> | <b>1.27 (1.01, 1.61)</b> | <b>0.99 (0.63, 1.55)</b> | <b>0.73 (0.47, 1.13)</b> | <b>0.64 (0.27, 1.51)</b> |
| MD Oth | 0.96 (0.91, 0.99)        | 0.94 (0.88, 0.99)        | 0.94 (0.84, 1.04)        | <b>0.97 (0.89, 1.05)</b> | <b>1.12 (0.98, 1.29)</b> | <b>0.97 (0.77, 1.22)</b> | <b>0.94 (0.86, 1.02)</b> | <b>0.87 (0.73, 1.04)</b> | <b>0.85 (0.62, 1.17)</b> |
| EM     | 0.80 (0.76, 0.85)        | 0.79 (0.71, 0.87)        | 0.75 (0.62, 0.90)        | <b>0.85 (0.71, 1.02)</b> | <b>1.16 (0.88, 1.51)</b> | <b>0.77 (0.46, 1.28)</b> | 0.83 (0.76, 0.90)        | 0.87 (0.78, 0.98)        | <b>0.97 (0.76, 1.23)</b> |
| Rad    | 0.80 (0.78, 0.82)        | 0.65 (0.62, 0.69)        | 0.75 (0.69, 0.81)        | 0.76 (0.72, 0.81)        | 0.82 (0.72, 0.93)        | 0.73 (0.59, 0.91)        | 0.75 (0.71, 0.80)        | 0.65 (0.57, 0.73)        | 0.61 (0.48, 0.78)        |
| UC     | <b>1.00 (0.94, 1.07)</b> | 0.79 (0.64, 0.97)        | <b>0.85 (0.53, 1.34)</b> | <b>0.72 (0.44, 1.18)</b> | <b>1.34 (0.89, 2.02)</b> | <b>1.55 (0.87, 2.78)</b> | <b>0.86 (0.69, 1.07)</b> | <b>0.71 (0.44, 1.14)</b> | <b>0.59 (0.19, 1.85)</b> |

Cells in red have risk ratio 95% confidence interval crossing the PCP reference of 1

Cells highlighted with bold font have at least 20 episodes and risk ratio 95% plus confidence interval greater than the PCP reference of 1 indicating greater likelihood to be the last HCP seen

PCP=primary care provider, DO=doctor of osteopathy, DC=doctor of chiropractic, PT=physical therapist, LAc=licensed acupuncturist, OS=orthopedic surgeon, PMR=physical medicine & rehabilitation, PM=pain medicine, NS=neurosurgeon, Neuro=neurologist, Rheum=rheumatologist, MD Oth = other medical physician, EM=emergency medicine, Rad=radiologist, UC=urgent care

Table 4 - Non-surgical low back pain service use and total cost for select health care providers (HCP) positioned as the last HCP seen

|                                      | Primary care provider (PCP) |                       |                         |                         | Doctor of Chiropractic (DC) |                        |                         |                         | Physical Therapist (PT) |                         |                           |                           | Orthopedic Surgeon (OS) |                         |                         |                           |
|--------------------------------------|-----------------------------|-----------------------|-------------------------|-------------------------|-----------------------------|------------------------|-------------------------|-------------------------|-------------------------|-------------------------|---------------------------|---------------------------|-------------------------|-------------------------|-------------------------|---------------------------|
| Episode Sequence                     | 1st                         | 2nd                   | 3rd                     | 4th                     | 1st                         | 2nd                    | 3rd                     | 4th                     | 1st                     | 2nd                     | 3rd                       | 4th                       | 1st                     | 2nd                     | 3rd                     | 4th                       |
|                                      | No 2nd                      | No 3rd                | No 4th                  | No 5th                  | No 2nd                      | No 3rd                 | No 4th                  | No 5th                  | No 2nd                  | No 3rd                  | No 4th                    | No 5th                    | No 2nd                  | No 3rd                  | No 4th                  | No 5th                    |
| Episodes                             | 88980                       | 24766                 | 8251                    | 2835                    | 107340                      | 13409                  | 3928                    | 1235                    | 3030                    | 5177                    | 2572                      | 1261                      | 15314                   | 5965                    | 2593                    | 1172                      |
| % of episodes including service      |                             |                       |                         |                         |                             |                        |                         |                         |                         |                         |                           |                           |                         |                         |                         |                           |
| Manipulation- Chiropractic           | 4.1%                        | 20.7%                 | 18.4%                   | 20.9%                   | 93.6%                       | 91.6%                  | 94.8%                   | 93.9%                   | 7.8%                    | 6.6%                    | 10.1%                     | 12.5%                     | 3.1%                    | 11.6%                   | 13.5%                   | 14.9%                     |
| Active Care                          | 9.8%                        | 15.1%                 | 21.2%                   | 28.3%                   | 30.9%                       | 35.5%                  | 43.4%                   | 47.9%                   | 96.6%                   | 97.2%                   | 97.3%                     | 97.9%                     | 20.1%                   | 27.6%                   | 35.2%                   | 42.2%                     |
| Passive Therapy                      | 4.5%                        | 10.3%                 | 11.9%                   | 14.8%                   | 36.8%                       | 38.9%                  | 46.3%                   | 50.3%                   | 28.7%                   | 26.5%                   | 28.5%                     | 30.3%                     | 6.7%                    | 11.0%                   | 14.3%                   | 14.2%                     |
| Manual Therapy                       | 7.3%                        | 10.3%                 | 14.0%                   | 18.8%                   | 17.9%                       | 21.0%                  | 27.3%                   | 33.2%                   | 77.4%                   | 74.2%                   | 73.8%                     | 74.8%                     | 14.1%                   | 18.8%                   | 24.0%                   | 28.5%                     |
| Acupuncture                          | 0.3%                        | 0.6%                  | 0.7%                    | 0.7%                    | 0.5%                        | 1.2%                   | 1.9%                    | 2.3%                    | 1.2%                    | 0.6%                    | 0.9%                      | 1.0%                      | 0.2%                    | 0.5%                    | 0.6%                    | 0.7%                      |
| Manipulation - Osteopathic           | 2.5%                        | 1.3%                  | 1.6%                    | 1.5%                    | 0.1%                        | 0.4%                   | 0.5%                    | 0.4%                    | 0.3%                    | 0.4%                    | 0.7%                      | 0.6%                      | 0.7%                    | 0.4%                    | 0.8%                    | 0.5%                      |
| Imaging - Radiography                | 21.1%                       | 31.6%                 | 45.7%                   | 51.5%                   | 18.8%                       | 29.5%                  | 43.0%                   | 53.6%                   | 16.3%                   | 42.7%                   | 57.7%                     | 63.4%                     | 73.6%                   | 68.7%                   | 71.9%                   | 73.5%                     |
| Rx - NSAID                           | 44.2%                       | 42.7%                 | 49.5%                   | 52.6%                   | 4.0%                        | 20.1%                  | 24.0%                   | 30.9%                   | 9.9%                    | 22.4%                   | 30.8%                     | 33.0%                     | 25.8%                   | 39.0%                   | 44.2%                   | 50.1%                     |
| Rx - Skeletal Muscle Relaxant        | 47.5%                       | 43.3%                 | 46.7%                   | 47.9%                   | 2.3%                        | 16.1%                  | 22.3%                   | 27.0%                   | 9.3%                    | 22.8%                   | 29.2%                     | 32.8%                     | 15.8%                   | 26.6%                   | 33.2%                   | 36.3%                     |
| Imaging - MRI                        | 4.9%                        | 6.5%                  | 13.3%                   | 24.8%                   | 1.2%                        | 3.7%                   | 8.8%                    | 16.8%                   | 9.6%                    | 11.4%                   | 22.2%                     | 33.0%                     | 18.5%                   | 27.8%                   | 40.2%                   | 50.5%                     |
| Rx-Opioid                            | 26.4%                       | 26.9%                 | 35.9%                   | 39.9%                   | 3.4%                        | 11.4%                  | 15.6%                   | 21.1%                   | 6.6%                    | 8.6%                    | 13.7%                     | 19.2%                     | 12.5%                   | 20.0%                   | 28.1%                   | 33.4%                     |
| Spinal Injection                     | 2.5%                        | 2.7%                  | 4.6%                    | 7.9%                    | 0.6%                        | 2.0%                   | 3.8%                    | 5.4%                    | 3.4%                    | 3.3%                    | 5.4%                      | 10.2%                     | 7.0%                    | 8.8%                    | 12.3%                   | 18.2%                     |
| Imaging-CT                           | 1.1%                        | 2.2%                  | 4.3%                    | 6.0%                    | 0.2%                        | 0.6%                   | 1.4%                    | 3.4%                    | 0.8%                    | 0.9%                    | 1.4%                      | 2.5%                      | 1.3%                    | 2.7%                    | 4.3%                    | 5.5%                      |
| Total Episode Cost - Median (Q1, Q3) |                             |                       |                         |                         |                             |                        |                         |                         |                         |                         |                           |                           |                         |                         |                         |                           |
| Total Episode Cost                   | \$106<br>(30,<br>220)       | \$218<br>(97,<br>537) | \$455<br>(202,<br>1131) | \$835<br>(364,<br>1926) | \$165<br>(68,<br>397)       | \$320<br>(149,<br>658) | \$573<br>(293,<br>1071) | \$877<br>(488,<br>1661) | \$528<br>(250,<br>1041) | \$688<br>(418,<br>1172) | \$1,012<br>(592,<br>1693) | \$1,333<br>(818,<br>2297) | \$229<br>(121,<br>597)  | \$504<br>(236,<br>1205) | \$920<br>(429,<br>1867) | \$1,343<br>(719,<br>2473) |



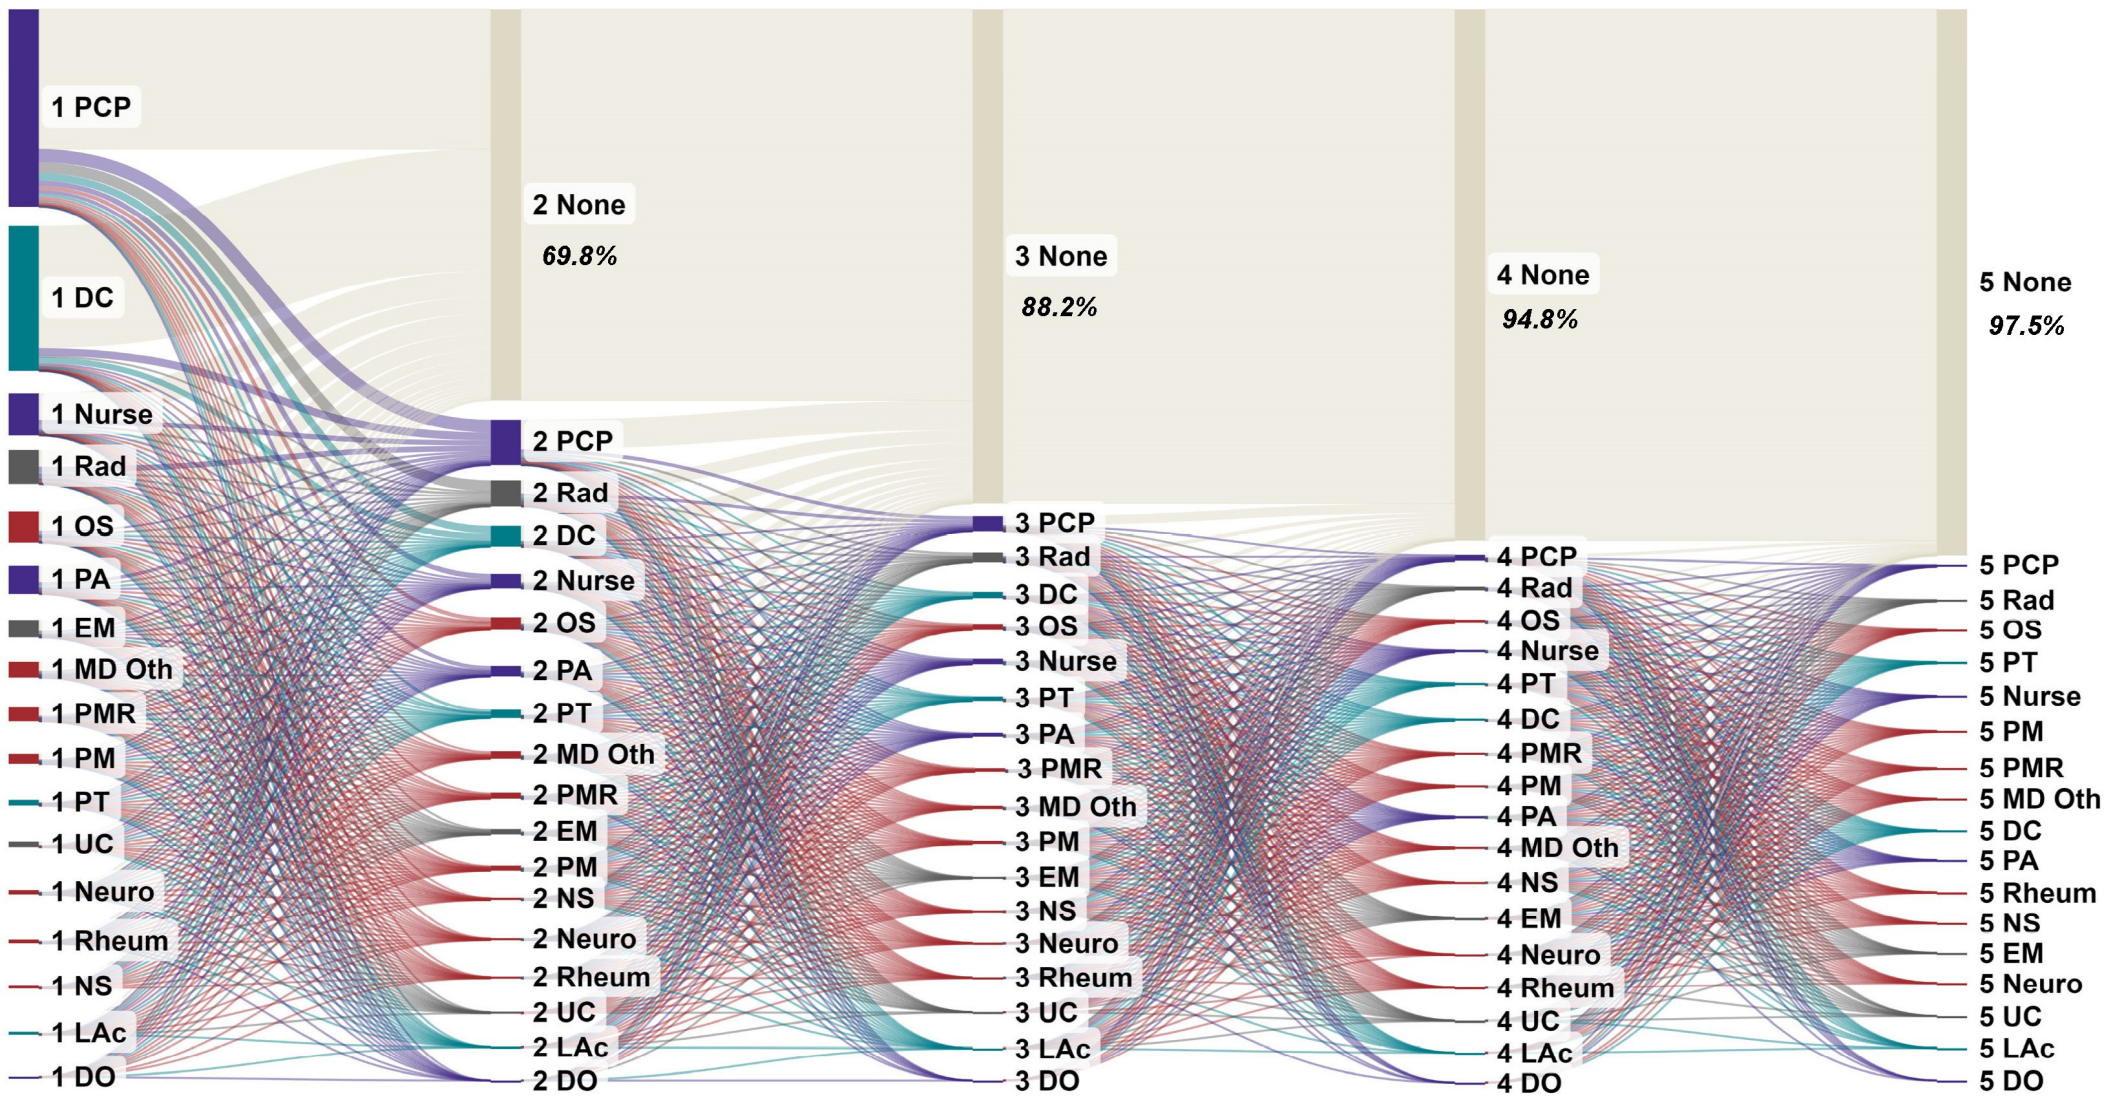

**Figure 1.** Flow of episodes from initial (1) to second (2) to third (3) to fourth (4) to fifth (5) type of health care provider (HCP) seen during an episode. PCP=primary care provider, DC=doctor of chiropractic, Rad=radiologist, OS=orthopedic surgeon, PA=physician's assistant, EM=emergency medicine, Oth=other, PMR=physical medicine & rehabilitation, PM=pain medicine, PT=physical therapist, UC=urgent care, Neuro=neurologist, Rheum=rheumatologist, NS=neurosurgeon, LAc=license acupuncturist, DO=doctor of osteopathy, None=no next HCP seen (previous HCP was the last HCP)



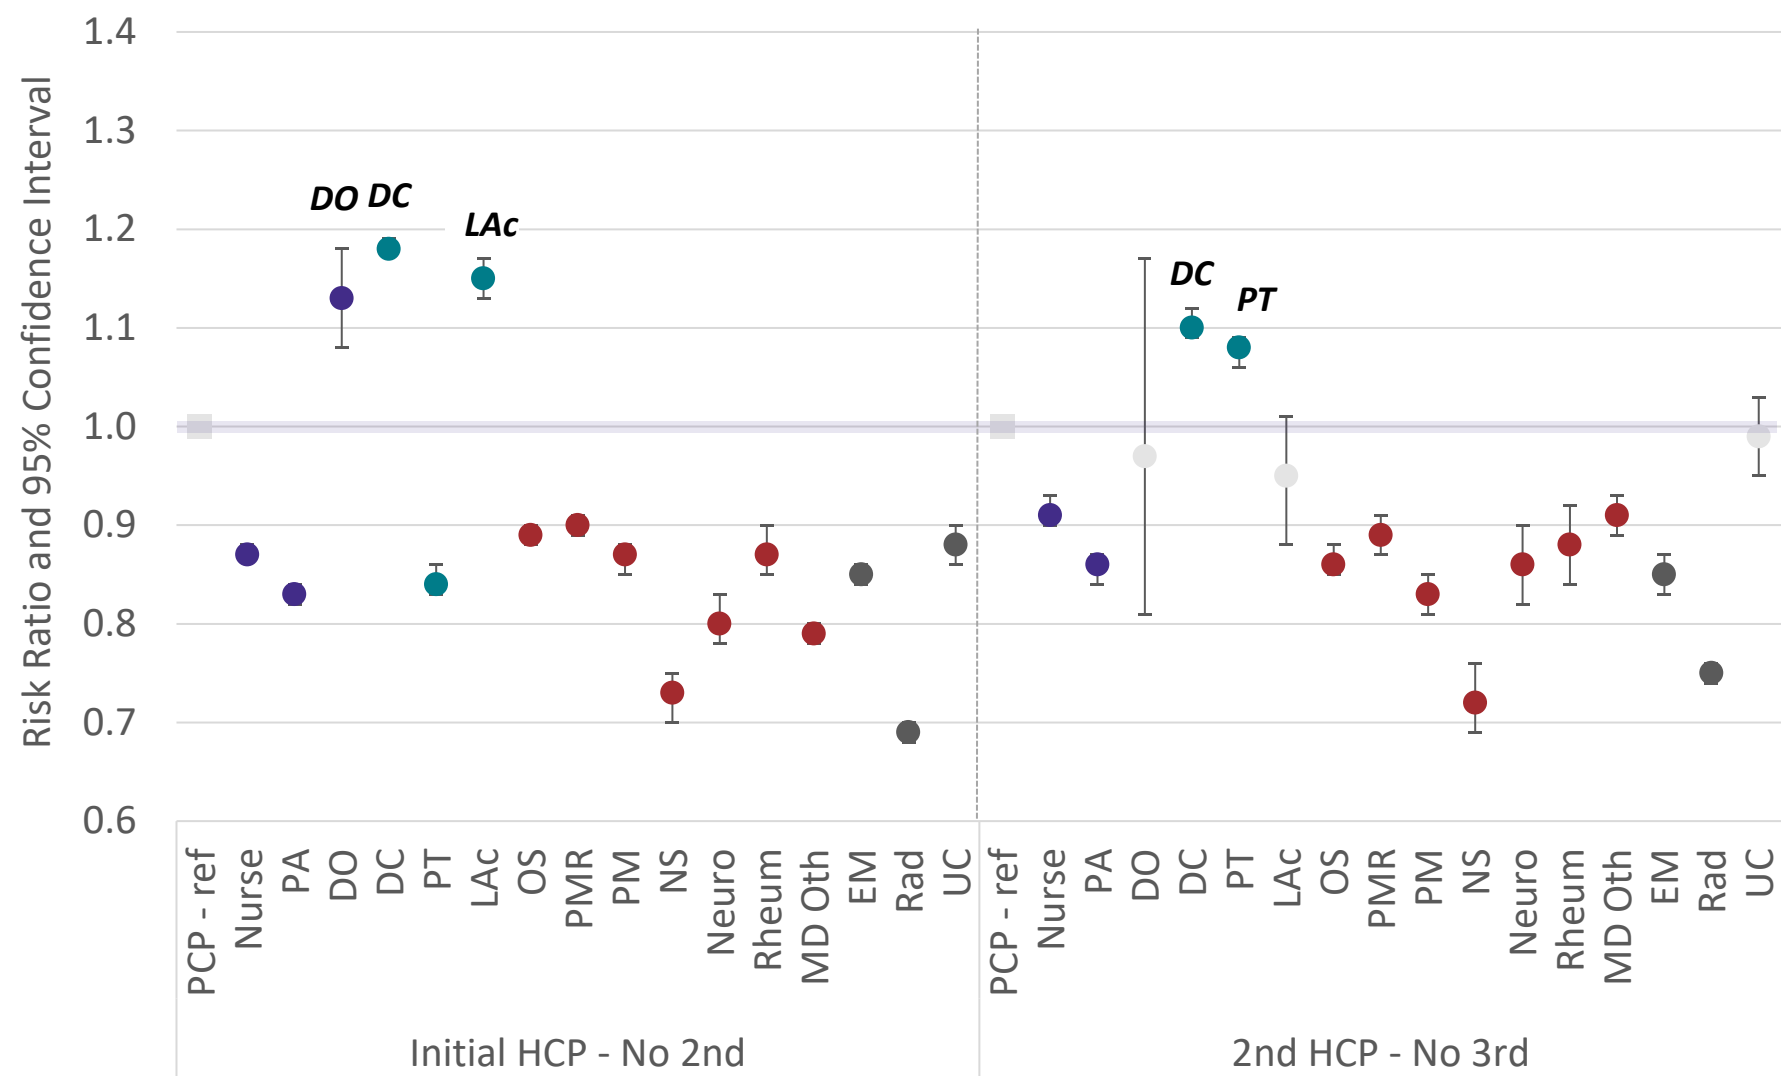

**Figure 2.** Risk ratio and 95% confidence interval compared to primary care provider (PCP) reference for % of episodes where HCPs with at least 20 episodes were the initial and last or 2nd and last HCP . PA=physician's assistant, DO=doctor of osteopathy, DC=doctor of chiropractic, PT=physical therapist, LAc=licensed acupuncturist, OS=orthopedic surgeon, PMR=physical medicine & rehabilitation, PM=pain management, NS=neurosurgeon, Neuro=neurologist, Rheum=rheumatologist, Oth=other, EM=emergency medicine, Rad=radiologist, UC=urgent care

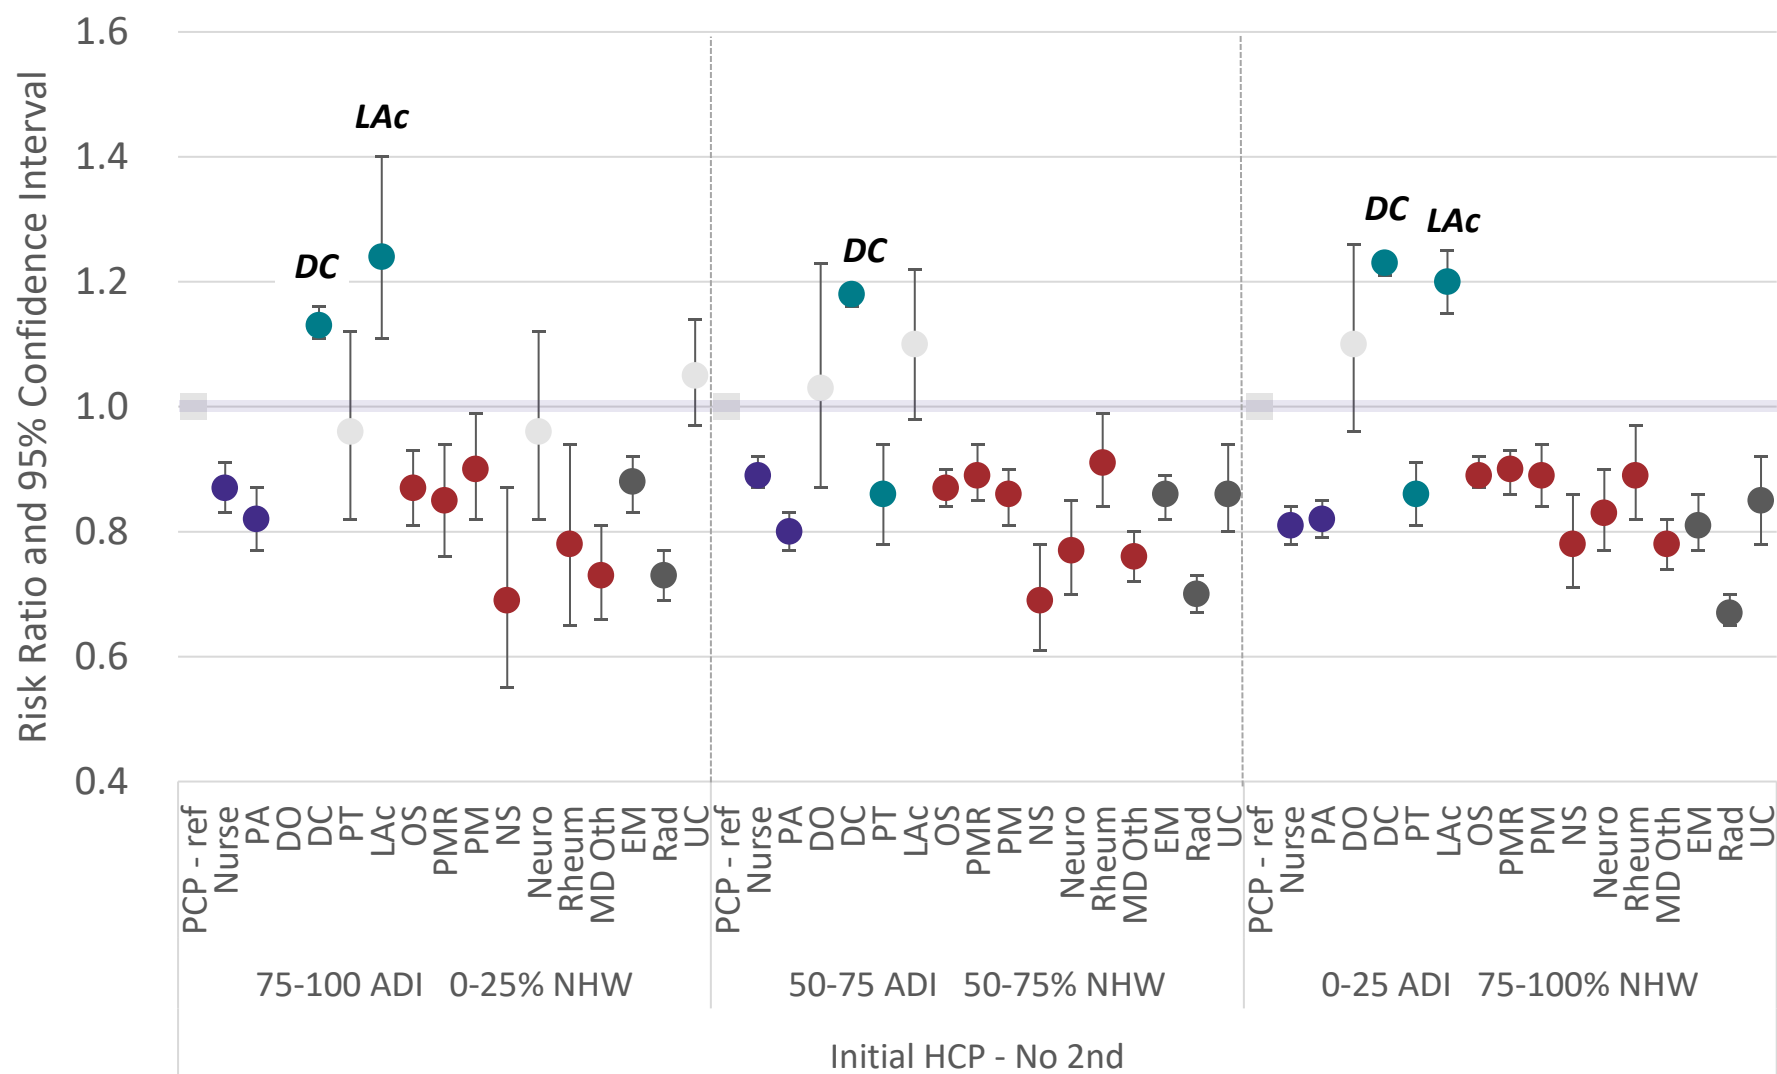

**Figure 3.** Risk ratio and 95% confidence interval compared to primary care provider (PCP) reference for % of episodes where HCPs with at least 20 episodes were the initial and last HCP seen segmented by population Area Deprivation Index (ADI) and % of the population that is non-Hispanic white (NHW). PA=physician's assistant, DO=doctor of osteopathy, DC=doctor of chiropractic, PT=physical therapist, LAc=licensed acupuncturist, OS=orthopedic surgeon, PMR=physical medicine & rehabilitation, PM=pain management, NS=neurosurgeon, Neuro=neurologist, Rheum=rheumatologist, Oth=other, EM=emergency medicine, Rad=radiologist, UC=urgent care

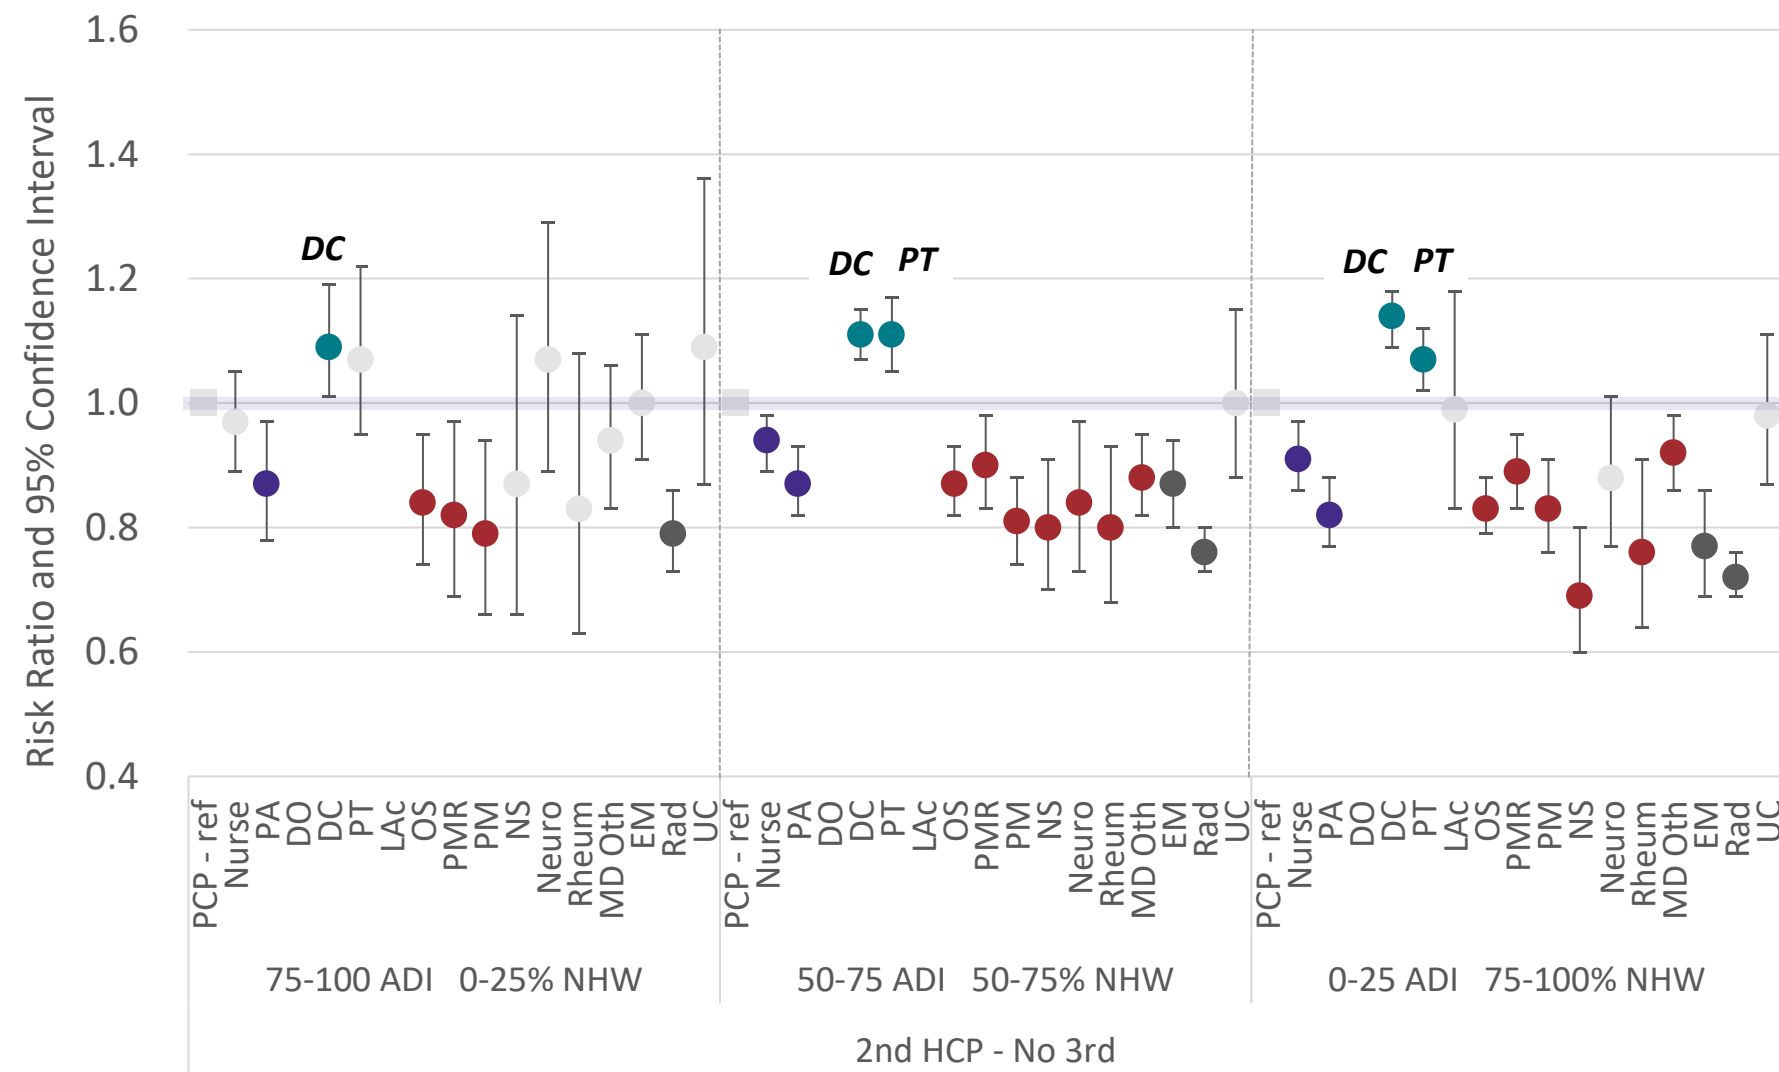

**Figure 4.** Risk ratio and 95% confidence interval compared to primary care provider (PCP) reference for % of episodes where HCPs with at least 20 episodes were the second and last HCP seen segmented by population Area Deprivation Index (ADI) and % of the population that is non-Hispanic white (NHW). PA=physician's assistant, DO=doctor of osteopathy, DC=doctor of chiropractic, PT=physical therapist, LAc=licensed acupuncturist, OS=orthopedic surgeon, PMR=physical medicine & rehabilitation, PM=pain management, NS=neurosurgeon, Neuro=neurologist, Rheum=rheumatologist, Oth=other, EM=emergency medicine, Rad=radiologist, UC=urgent care

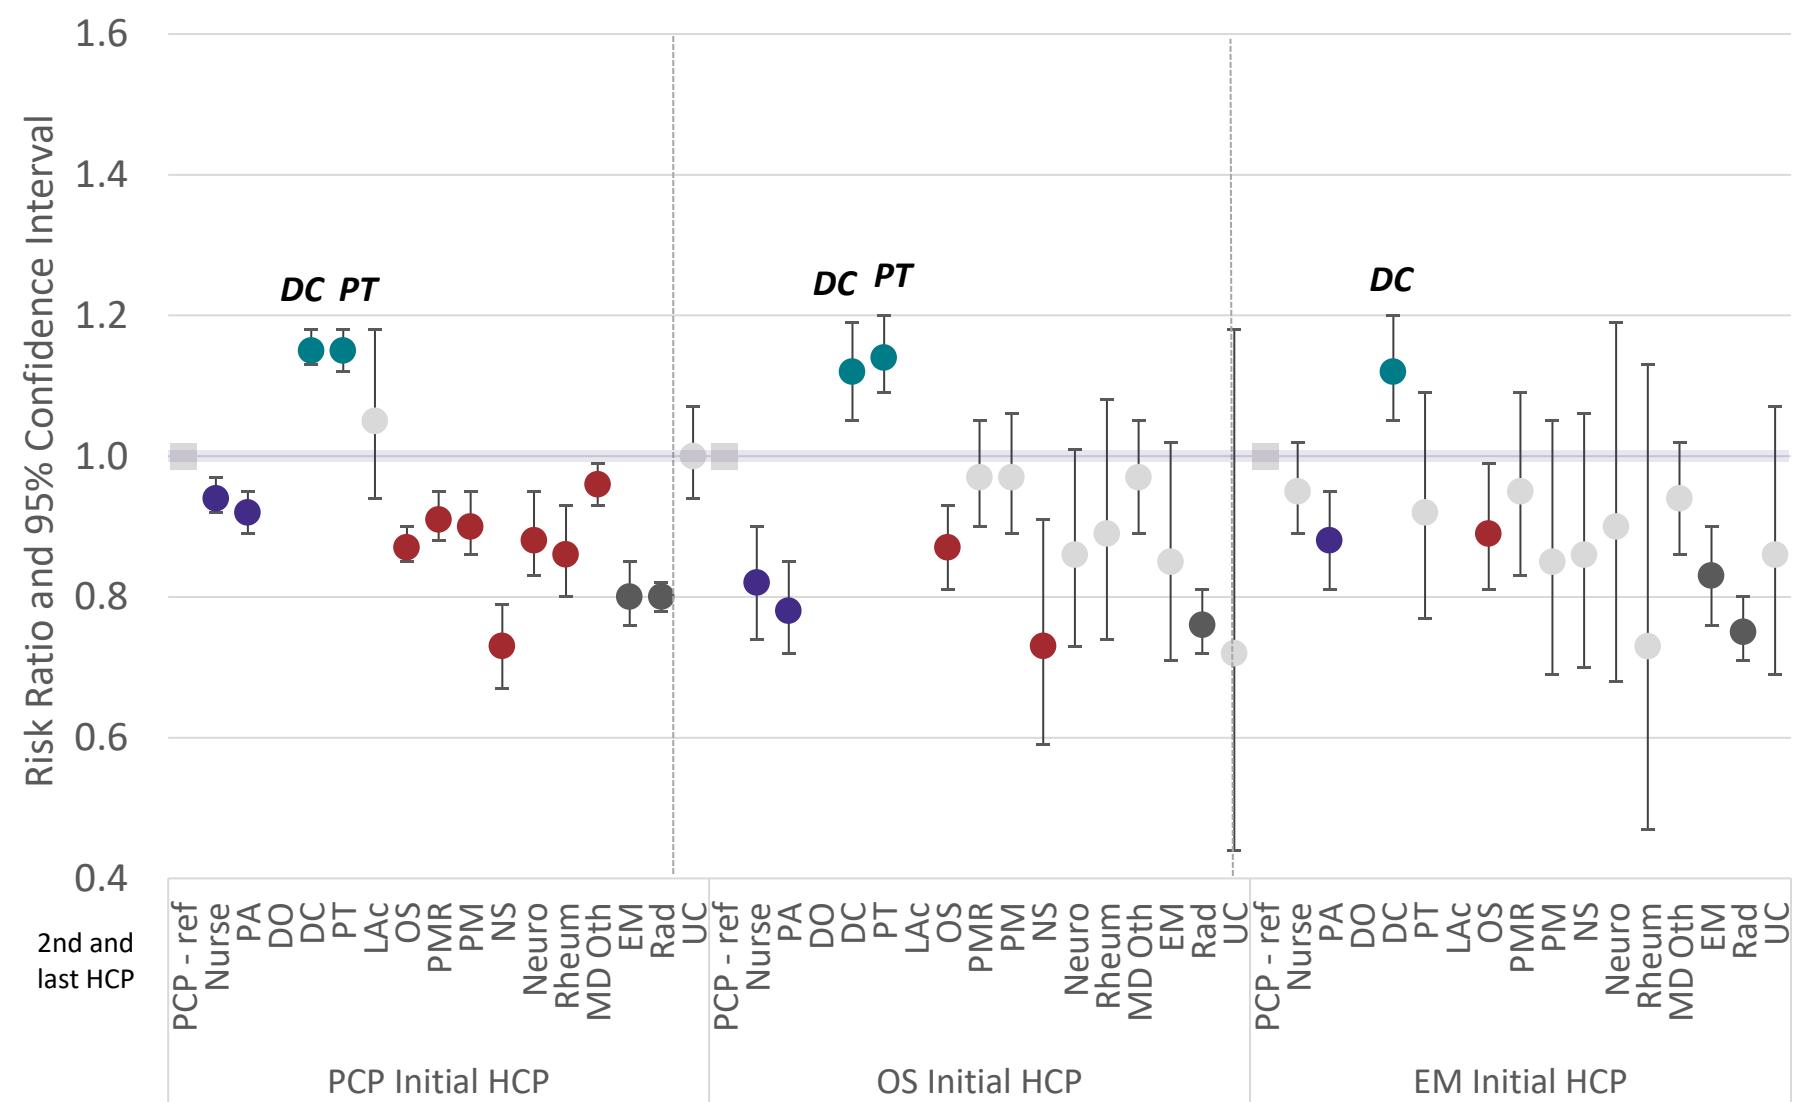

**Figure 5.** - Risk ratio and 95% confidence interval compared to primary care provider (PCP) reference for % of episodes where for health care providers with at least 20 episodes the type of second HCP seen was also the last HCP seen. PA=physician's assistant, DO=doctor of osteopathy, DC=doctor of chiropractic, PT=physical therapist, LAC=licensed acupuncturist, OS=orthopedic surgeon, PMR=physical medicine & rehabilitation, PM=pain management, NS=neurosurgeon, Neuro=neurologist, Rheum=rheumatologist, Oth=other, EM=emergency medicine, Rad=radiologist, UC=urgent care

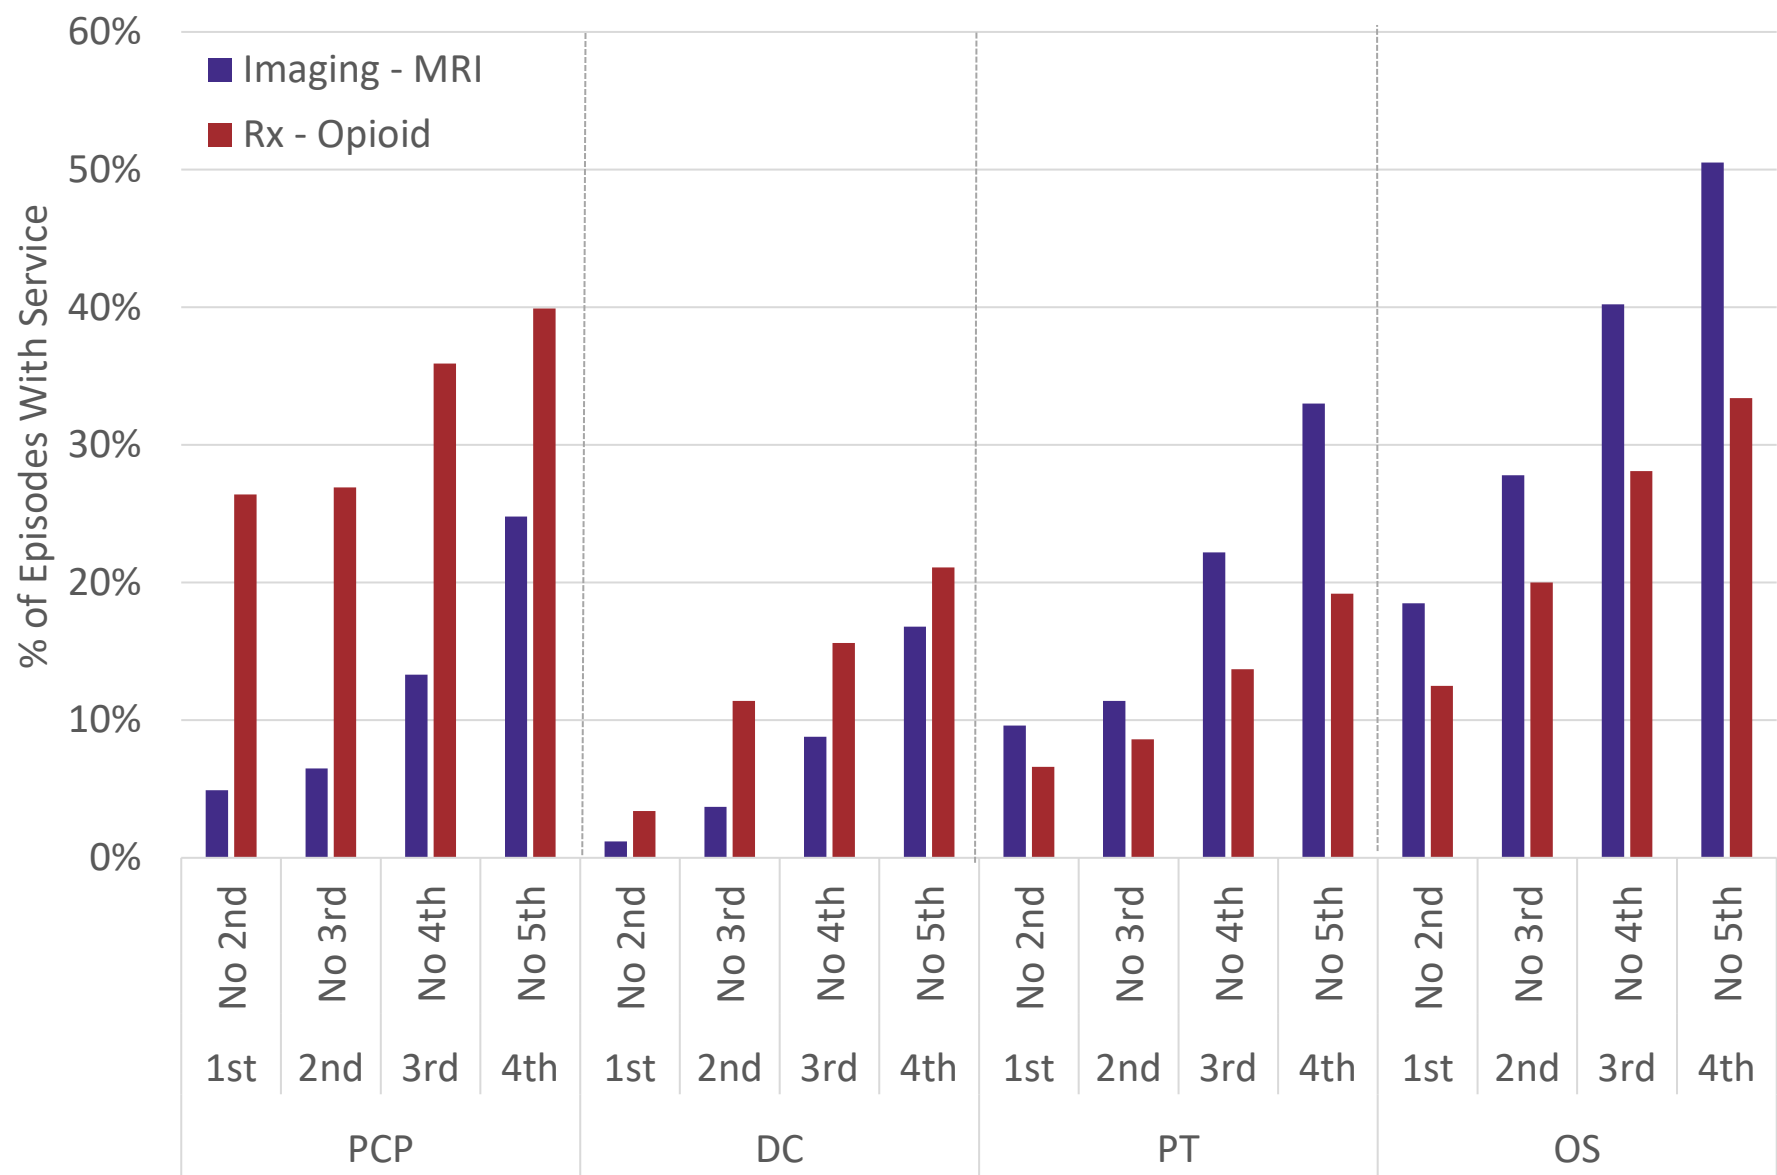

**Figure 6.** % of episodes with an MRI scan or prescription opioid for episodes where a primary care physician (PCP), chiropractor (DC), physical therapist (PT) or orthopedic surgeon (OS) was the last health care provider seen based on whether the PCP, DC, PT, or OS were the 1st, 2nd, 3rd or 4th HCP seen during an episode

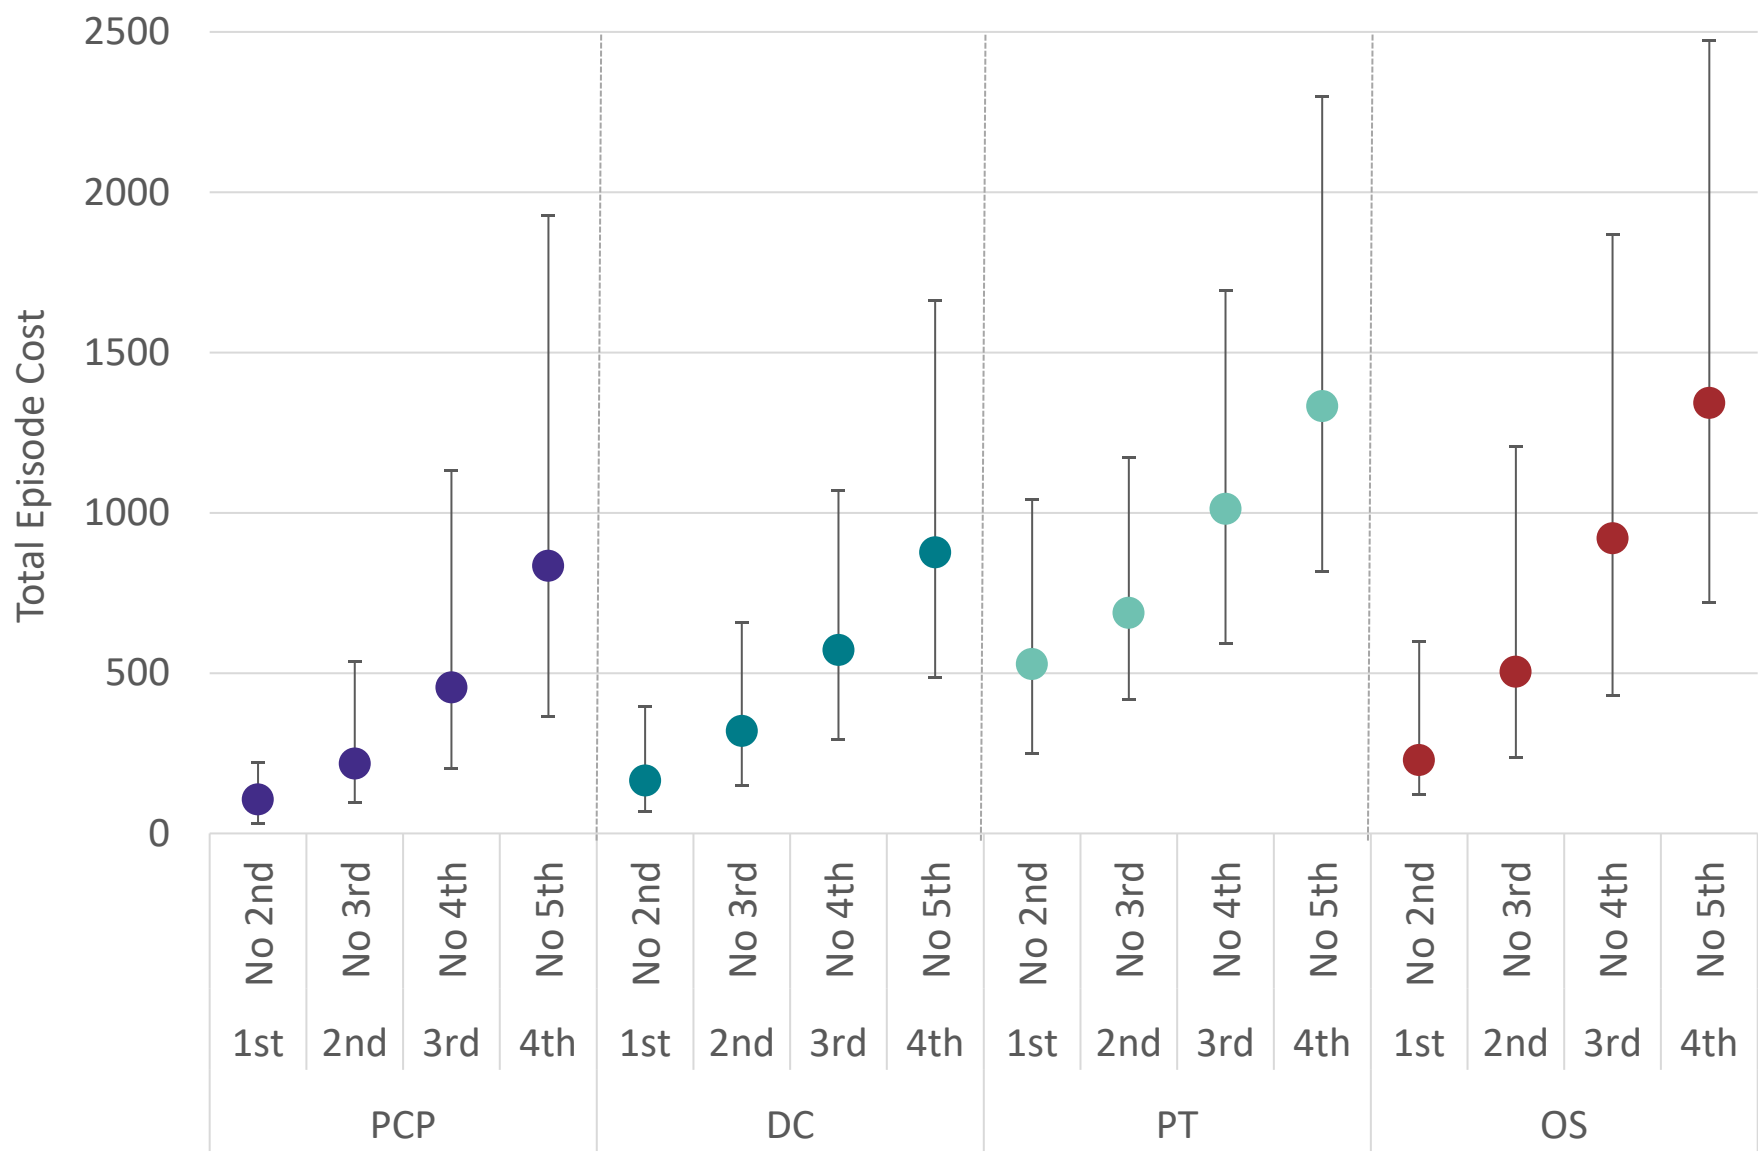

**Figure 7.** Median total episode cost and interquartile range (Q1, Q3) for episodes where a primary care physician (PCP), chiropractor (DC), physical therapist (PT) or orthopedic surgeon (OS) was the last health care provider seen based on whether the PCP, DC, PT, or OS was the 1st, 2nd, 3rd or 4th HCP seen during an episode
