# Supplementary material for: Low back pain care pathways – is the last provider seen more important than the first: A retrospective cohort study
Source: bioRxiv or medRxiv preprint supplement (doi:10.1101/2022.10.27.22281624), 2022-11-22
Supplement: Supplementary file [file media-1.pdf]

| Supplement 1 - Cohort Attributes                                      |                                          |                         |
|-----------------------------------------------------------------------|------------------------------------------|-------------------------|
| Individuals                                                           |                                          | 503958                  |
| Episodes                                                              |                                          | 503958                  |
| # Unique Health Care Providers (HCP)                                  |                                          | 196522                  |
| Total Cost                                                            |                                          | 387867096               |
| Individual attributes - % or Median (Q1, Q3)                          |                                          |                         |
| Female                                                                |                                          | 52.9%                   |
| Age                                                                   |                                          | 44 (34, 54)             |
| ERG Risk Score                                                        |                                          | 1.3 (0.6, 2.8)          |
| Individual Home Address 5 Digit Zip Code Attributes - Median (Q1, Q3) |                                          |                         |
| Population % Non-Hispanic White (NWH)                                 |                                          | 72.7% (51.7%, 85.5%)    |
| Area Deprivation Index (ADI)                                          |                                          | 45 (28, 62)             |
| Household Adjusted Gross Income (AGI)                                 |                                          | 64,389 (50,223, 90,352) |
| HCP per 1000 - DC                                                     |                                          | 0.23 (0.09, 0.43)       |
| HCP per 1000 - PT                                                     |                                          | 0.17 (0.04, 0.41)       |
| HCP per 1000 - LAc                                                    |                                          | 0.00 (0.00, 0.03)       |
| Episode Attributes - Median (Q1, Q3) (Minimum)                        |                                          |                         |
| Clean Period - Before Initial Episode - Days                          |                                          | 646 (431, 865) (91)     |
| Clean Period - After Final Episode - Days                             |                                          | 405 (248, 638) (61)     |
| Episode Duration - Days                                               |                                          | 28 (1, 141) (1)         |
| Episode Cost                                                          |                                          | \$204 (78, 647)         |
| # of HCP Seen                                                         |                                          | 2 (1, 3)                |
| Type of HCP Initially Contacted - Episodes (%)                        |                                          |                         |
| Primary Care                                                          | Primary care provider (PCP)              | 177265 (35.2%)          |
|                                                                       | Nurse                                    | 37857 (7.5%)            |
|                                                                       | Physician's Assistant (PA)               | 25350 (5.0%)            |
|                                                                       | Doctor of Osteopathy (DO)                | 469 (0.1%)              |
| Non-Prescriber                                                        | Doctor of Chiropractic (DC)              | 130520 (25.9%)          |
|                                                                       | Physical Therapist (PT)                  | 5114 (1.0%)             |
|                                                                       | Licensed Acupuncturist (LAc)             | 2634 (0.5%)             |
| Specialist                                                            | Orthopedic Surgeon (OS)                  | 27799 (5.5%)            |
|                                                                       | Physical Medicine & Rehabilitatino (PMR) | 12496 (2.5%)            |
|                                                                       | Pain Management (PM)                     | 9013 (1.8%)             |
|                                                                       | Neurosurgeon (NS)                        | 3058 (0.6%)             |
|                                                                       | Neurologist (Neuro)                      | 3917 (0.8%)             |
|                                                                       | Rheumatologist (Rheum)                   | 3354 (0.7%)             |
|                                                                       | MD - Other                               | 13877 (2.8%)            |
| Emergency /Urgent                                                     | Emergency Medicine (EM)                  | 15760 (3.1%)            |
|                                                                       | Radiology (Rad)                          | 30393 (6.0%)            |
|                                                                       | Urgent Care (UC)                         | 5082 (1.0%)             |
