# Supplementary material for: Low back pain care pathways – is the last provider seen more important than the first: A retrospective cohort study
Source: bioRxiv or medRxiv preprint supplement (doi:10.1101/2022.10.27.22281624), 2022-11-22
Supplement: Supplementary file [file media-2.pdf]

Supplement 2 - Cohort attributes by type of initial health care provider (HCP) contacted

| % or Median (Q1, Q3) |                                          | # Episodes (%) | Individual attributes |             |                 | Individual home address zip code population attributes |                                       |                                       |
|----------------------|------------------------------------------|----------------|-----------------------|-------------|-----------------|--------------------------------------------------------|---------------------------------------|---------------------------------------|
|                      |                                          |                | % Female              | Age         | ERG® Risk Score | Area Deprivation Index (ADI)                           | Household Adjusted Gross Income (AGI) | % non-Hispanic White (NHW) population |
| Primary Care         | Primary care provider (PCP)              | 177265 (35.2%) | 52.9%                 | 46 (36, 55) | 1.4 (0.7, 2.8)  | 46 (29, 64)                                            | 62,793 (48,913, 87,588)               | 69.5% (47.4%, 84.0%)                  |
|                      | Nurse                                    | 37857 (7.5%)   | 55.8%                 | 44 (34, 54) | 1.4 (0.6, 2.7)  | 55 (38, 69)                                            | 56,665 (46,621, 74,594)               | 76.3% (56.5%, 88.5%)                  |
|                      | Physician's Assistant (PA)               | 25350 (5.0%)   | 52.3%                 | 44 (34, 54) | 1.3 (0.6, 2.7)  | 47 (32, 63)                                            | 62,052 (49,516, 83,108)               | 75.1% (55.6%, 86.6%)                  |
|                      | Doctor of Osteopathy (DO)                | 469 (0.1%)     | 63.8%                 | 45 (35, 55) | 1.5 (0.7, 2.7)  | 41 (26, 60)                                            | 71,892 (55,139, 106,885)              | 76.4% (58.8%, 86.3%)                  |
| Non-Prescriber       | Doctor of Chiropractic (DC)              | 130520 (25.9%) | 51.5%                 | 40 (31, 50) | 1.0 (0.4, 2.0)  | 43 (28, 60)                                            | 67,675 (53,316, 93,242)               | 76.8% (59.7%, 88.1%)                  |
|                      | Physical Therapist (PT)                  | 5114 (1.0%)    | 59.0%                 | 44 (34, 54) | 1.6 (0.8, 3.2)  | 32 (19, 51)                                            | 78,426 (57,402, 114,853)              | 72.5% (53.2%, 83.8%)                  |
|                      | Licensed Acupuncturist (LAc)             | 2634 (0.5%)    | 65.7%                 | 40 (33, 50) | 1.1 (0.5, 2.5)  | 23 (12, 36)                                            | 89,698 (64,422, 132,336)              | 60.9% (40.4%, 76.4%)                  |
| Specialist           | Orthopedic Surgeon (OS)                  | 27799 (5.5%)   | 52.0%                 | 48 (36, 56) | 1.8 (0.8, 3.4)  | 38 (21, 56)                                            | 74,460 (54,706, 112,306)              | 68.7% (49.0%, 82.1%)                  |
|                      | Physical Medicine & Rehabilitation (PMR) | 12496 (2.5%)   | 52.7%                 | 48 (37, 56) | 2.0 (0.9, 3.7)  | 35 (19, 55)                                            | 77,360 (55,597, 117,460)              | 69.7% (50.4%, 82.5%)                  |
|                      | Pain Management (PM)                     | 9013 (1.8%)    | 53.6%                 | 50 (41, 57) | 2.9 (1.5, 5.0)  | 46 (29, 62)                                            | 64,795 (49,810, 92,276)               | 67.8% (49.0%, 81.6%)                  |
|                      | Neurosurgeon (NS)                        | 3058 (0.6%)    | 47.5%                 | 50 (39, 57) | 2.4 (1.1, 4.1)  | 44 (27, 62)                                            | 68,771 (51,468, 102,885)              | 72.1% (53.1%, 84.6%)                  |
|                      | Neurologist (Neuro)                      | 3917 (0.8%)    | 62.5%                 | 49 (39, 56) | 2.8 (1.5, 5.0)  | 42 (24, 59)                                            | 68,005 (51,450, 98,214)               | 67.6% (46.9%, 82.2%)                  |
|                      | Rheumatologist (Rheum)                   | 3354 (0.7%)    | 72.2%                 | 50 (40, 57) | 3.0 (1.7, 4.8)  | 45 (27, 62)                                            | 65,381 (50,307, 93,503)               | 70.4% (48.7%, 84.2%)                  |
|                      | MD - Other                               | 13877 (2.8%)   | 53.5%                 | 47 (37, 56) | 2.3 (1.1, 4.3)  | 43 (26, 61)                                            | 66,594 (50,771, 95,516)               | 70.6% (49.4%, 83.7%)                  |
| Emergency/Urgent     | Emergency Medicine (EM)                  | 15760 (3.1%)   | 50.0%                 | 40 (31, 51) | 1.3 (0.6, 2.6)  | 51 (33, 67)                                            | 58,123 (45,859, 79,092)               | 67.8% (41.9%, 84.0%)                  |
|                      | Radiology (Rad)                          | 30393 (6.0%)   | 53.3%                 | 45 (33, 55) | 1.7 (0.8, 3.5)  | 48 (30, 65)                                            | 61,547 (48,053, 86,376)               | 73.0% (49.5%, 86.5%)                  |
|                      | Urgent Care (UC)                         | 5082 (1.0%)    | 50.8%                 | 40 (31, 50) | 0.9 (0.4, 1.9)  | 39 (24, 56)                                            | 66,163 (50,378, 90,791)               | 64.8% (41.8%, 81.4%)                  |
