# Supplementary material for: Low back pain care pathways – is the last provider seen more important than the first: A retrospective cohort study
Source: bioRxiv or medRxiv preprint supplement (doi:10.1101/2022.10.27.22281624), 2022-11-22
Supplement: Supplementary file [file media-3.pdf]

| Supplement 3 - Non-surgical low back pain cohort and local population attributes associated with type of health care provider (HCP) seen last based on sequence of HCP involvement in episode |                       |             |             |                                         |                              |                |                |                                 |                                                  |                          |                           |                          |
|-----------------------------------------------------------------------------------------------------------------------------------------------------------------------------------------------|-----------------------|-------------|-------------|-----------------------------------------|------------------------------|----------------|----------------|---------------------------------|--------------------------------------------------|--------------------------|---------------------------|--------------------------|
| Type of HCP                                                                                                                                                                                   | 1st HCP               | 2nd HCP     | 3rd HCP     | 4th HCP                                 | 1st HCP                      | 2nd HCP        | 3rd HCP        | 4th HCP                         | 1st HCP                                          | 2nd HCP                  | 3rd HCP                   | 4th HCP                  |
|                                                                                                                                                                                               | No 2nd                | No 3rd      | No 4th      | No 5th                                  | No 2nd                       | No 3rd         | No 4th         | No 5th                          | No 2nd                                           | No 3rd                   | No 4th                    | No 5th                   |
|                                                                                                                                                                                               | Individual - % Female |             |             |                                         | Individual - ERG® Risk Score |                |                |                                 | Zip Code - Household Adjusted Gross Income (AGI) |                          |                           |                          |
| PCP                                                                                                                                                                                           | 52.4%                 | 55.2%       | 55.9%       | 55.1%                                   | 1.3 (0.6, 2.5)               | 1.5 (0.8, 3.0) | 1.9 (1.0, 3.6) | 2.3 (1.2, 4.1)                  | 62,512 (48,686, 87,314)                          | 62,491 (48,907, 85,596)  | 61,283 (48,540, 82,124)   | 60,173 (48,385, 80,286)  |
| Nurse                                                                                                                                                                                         | 56.0%                 | 55.5%       | 57.2%       | 58.5%                                   | 1.2 (0.6, 2.5)               | 1.5 (0.7, 2.9) | 1.8 (1.0, 3.6) | 2.4 (1.3, 4.1)                  | 56,355 (46,461, 73,712)                          | 56,523 (46,496, 73,707)  | 56,379 (46,671, 73,501)   | 56,696 (46,094, 75,629)  |
| PA                                                                                                                                                                                            | 52.6%                 | 52.1%       | 53.3%       | 53.4%                                   | 1.2 (0.5, 2.3)               | 1.4 (0.7, 2.7) | 1.8 (0.9, 3.3) | 2.1 (1.1, 3.7)                  | 61,660 (49,308, 82,671)                          | 61,308 (49,034, 81,246)  | 59,945 (47,919, 80,256)   | 63,498 (49,863, 84,877)  |
| DO                                                                                                                                                                                            | 64.4%                 | 70.7%       | 60.7%       | 75.0%                                   | 1.3 (0.6, 2.6)               | 2.0 (1.2, 3.1) | 2.9 (1.5, 4.1) | 1.2 (0.5, 2.1)                  | 72,666 (55,400, 106,019)                         | 71,729 (53,876, 111,161) | 76,931 (56,952, 94,238)   | 62,446 (61,032, 76,753)  |
| DC                                                                                                                                                                                            | 50.8%                 | 53.9%       | 54.1%       | 56.1%                                   | 0.9 (0.4, 1.9)               | 1.3 (0.7, 2.6) | 1.5 (0.8, 2.9) | 1.8 (0.9, 3.4)                  | 67,808 (53,384, 93,628)                          | 66,189 (52,702, 90,643)  | 67,396 (52,832, 92,216)   | 64,795 (51,740, 87,129)  |
| PT                                                                                                                                                                                            | 59.3%                 | 55.1%       | 54.6%       | 54.2%                                   | 1.4 (0.7, 2.9)               | 1.3 (0.6, 2.6) | 1.4 (0.7, 2.8) | 1.5 (0.8, 2.9)                  | 77,923 (56,796, 114,374)                         | 77,363 (56,565, 112,463) | 77,437 (56,507, 110,546)  | 75,051 (55,229, 106,906) |
| LAc                                                                                                                                                                                           | 65.6%                 | 67.0%       | 60.9%       | 62.2%                                   | 1.0 (0.4, 2.3)               | 1.4 (0.8, 2.8) | 1.6 (0.7, 2.6) | 1.6 (0.8, 3.3)                  | 89,170 (64,425, 132,126)                         | 92,400 (65,275, 133,396) | 103,584 (72,731, 133,954) | 87,140 (61,539, 117,491) |
| OS                                                                                                                                                                                            | 52.0%                 | 50.2%       | 50.0%       | 49.7%                                   | 1.6 (0.8, 3.1)               | 1.9 (0.9, 3.4) | 2.2 (1.0, 3.8) | 2.4 (1.2, 4.0)                  | 75,175 (54,730, 114,194)                         | 70,468 (52,778, 105,839) | 67,684 (52,031, 101,999)  | 68,815 (52,173, 102,279) |
| PMR                                                                                                                                                                                           | 52.2%                 | 50.5%       | 52.4%       | 50.5%                                   | 1.8 (0.9, 3.4)               | 2.0 (1.0, 3.7) | 2.4 (1.2, 4.1) | 2.5 (1.2, 4.1)                  | 77,799 (55,671, 116,417)                         | 74,595 (54,020, 110,982) | 71,570 (53,017, 108,318)  | 69,658 (52,395, 106,095) |
| PM                                                                                                                                                                                            | 52.5%                 | 52.9%       | 53.5%       | 51.3%                                   | 2.8 (1.4, 4.6)               | 2.8 (1.5, 4.7) | 2.9 (1.5, 4.7) | 3.1 (1.6, 5.1)                  | 65,353 (49,810, 93,818)                          | 64,177 (50,352, 89,602)  | 64,297 (49,834, 90,352)   | 63,885 (50,307, 91,003)  |
| NS                                                                                                                                                                                            | 45.6%                 | 49.3%       | 43.1%       | 42.6%                                   | 2.0 (0.9, 3.7)               | 2.3 (1.1, 3.9) | 2.3 (1.1, 3.8) | 2.5 (1.2, 4.3)                  | 69,405 (52,360, 106,258)                         | 65,122 (50,805, 92,490)  | 64,230 (48,501, 96,013)   | 62,207 (49,356, 85,000)  |
| Neuro                                                                                                                                                                                         | 60.8%                 | 58.5%       | 57.8%       | 62.7%                                   | 2.6 (1.4, 4.4)               | 2.7 (1.3, 4.7) | 2.9 (1.5, 5.3) | 3.6 (1.9, 5.8)                  | 69,197 (51,676, 100,639)                         | 67,589 (50,985, 96,009)  | 67,271 (50,396, 95,772)   | 63,582 (49,790, 87,160)  |
| Rheum                                                                                                                                                                                         | 71.1%                 | 74.2%       | 75.9%       | 71.7%                                   | 2.8 (1.6, 4.5)               | 3.0 (1.7, 5.0) | 3.5 (1.8, 5.3) | 3.6 (2.2, 5.3)                  | 64,795 (49,759, 94,171)                          | 66,193 (49,507, 92,224)  | 66,252 (51,257, 94,773)   | 62,960 (50,371, 87,782)  |
| MD Oth                                                                                                                                                                                        | 52.8%                 | 52.7%       | 52.0%       | 52.4%                                   | 2.1 (1.0, 3.9)               | 2.2 (1.1, 3.9) | 2.6 (1.4, 4.5) | 3.0 (1.7, 5.5)                  | 67,084 (50,985, 95,516)                          | 66,500 (51,457, 95,152)  | 68,210 (51,562, 95,833)   | 64,694 (50,262, 95,147)  |
| EM                                                                                                                                                                                            | 50.5%                 | 50.7%       | 53.1%       | 59.6%                                   | 1.1 (0.5, 2.3)               | 1.4 (0.6, 2.8) | 1.7 (0.8, 3.3) | 2.4 (1.3, 4.6)                  | 57,854 (45,436, 78,906)                          | 56,850 (45,624, 77,489)  | 57,293 (45,833, 73,371)   | 58,705 (46,269, 79,994)  |
| Rad                                                                                                                                                                                           | 54.3%                 | 53.1%       | 51.0%       | 54.0%                                   | 1.6 (0.7, 3.3)               | 1.4 (0.7, 2.8) | 1.8 (0.9, 3.4) | 2.3 (1.1, 4.3)                  | 60,763 (47,286, 84,972)                          | 62,483 (49,279, 86,747)  | 63,498 (50,108, 88,611)   | 63,294 (49,337, 94,574)  |
| UC                                                                                                                                                                                            | 51.5%                 | 47.6%       | 49.7%       | 50.0%                                   | 0.8 (0.4, 1.8)               | 0.8 (0.4, 1.8) | 1.2 (0.6, 2.1) | 1.7 (0.8, 3.2)                  | 65,540 (49,628, 89,971)                          | 68,063 (53,220, 90,050)  | 71,479 (53,657, 101,311)  | 64,970 (51,507, 84,166)  |
| Individual - Age                                                                                                                                                                              |                       |             |             | Zip Code - Area Deprivation Index (ADI) |                              |                |                | Zip Code - % Non-Hispanic White |                                                  |                          |                           |                          |
| PCP                                                                                                                                                                                           | 46 (35, 55)           | 45 (35, 55) | 47 (37, 56) | 48 (38, 56)                             | 47 (29, 64)                  | 47 (30, 64)    | 49 (32, 65)    | 49 (32, 66)                     | 68.6% (46.1%, 88.4%)                             | 71.8% (49.5%, 85.1%)     | 73.0% (50.1%, 86.0%)      | 73.5% (51.6%, 86.8%)     |
| Nurse                                                                                                                                                                                         | 43 (33, 53)           | 44 (34, 53) | 46 (36, 54) | 46 (37, 56)                             | 55 (39, 69)                  | 55 (39, 69)    | 54 (38, 69)    | 55 (38, 70)                     | 76.0% (55.7%, 88.3%)                             | 76.2% (56.2%, 88.3%)     | 76.1% (56.4%, 89.0%)      | 77.4% (57.2%, 88.8%)     |
| PA                                                                                                                                                                                            | 43 (33, 53)           | 44 (34, 54) | 46 (35, 55) | 48 (38, 55)                             | 48 (32, 64)                  | 49 (33, 64)    | 50 (34, 65)    | 48 (31, 63)                     | 75.0% (55.3%, 86.6%)                             | 74.4% (54.0%, 86.3%)     | 74.4% (55.5%, 87.3%)      | 76.2% (58.5%, 87.9%)     |
| DO                                                                                                                                                                                            | 44 (35, 53)           | 45 (34, 52) | 53 (40, 58) | 44 (31, 57)                             | 41 (26, 58)                  | 43 (28, 63)    | 41 (29, 48)    | 54 (39, 62)                     | 76.1% (58.6%, 86.3%)                             | 69.1% (59.9%, 86.7%)     | 75.1% (62.2%, 84.4%)      | 74.3% (61.2%, 86.7%)     |
| DC                                                                                                                                                                                            | 39 (30, 50)           | 42 (33, 52) | 43 (33, 53) | 45 (35, 54)                             | 43 (27, 60)                  | 45 (29, 61)    | 44 (28, 60)    | 44 (29, 60)                     | 76.7% (59.4%, 88.0%)                             | 77.0% (60.0%, 88.2%)     | 76.6% (59.9%, 88.2%)      | 76.6% (60.5%, 87.9%)     |
| PT                                                                                                                                                                                            | 43 (33, 54)           | 44 (34, 55) | 45 (35, 55) | 46 (35, 55)                             | 33 (19, 52)                  | 34 (19, 51)    | 34 (19, 52)    | 36 (21, 55)                     | 71.4% (52.4%, 83.2%)                             | 71.4% (52.3%, 82.9%)     | 72.4% (52.9%, 83.7%)      | 73.6% (54.5%, 84.6%)     |
| LAc                                                                                                                                                                                           | 39 (33, 50)           | 42 (33, 51) | 42 (36, 51) | 45 (37, 50)                             | 23 (12, 36)                  | 21 (12, 36)    | 19 (11, 32)    | 24 (10, 39)                     | 61.3% (40.2%, 76.5%)                             | 63.4% (41.5%, 77.3%)     | 63.6% (47.7%, 78.3%)      | 56.6% (31.2%, 77.8%)     |
| OS                                                                                                                                                                                            | 47 (35, 56)           | 47 (36, 56) | 48 (37, 57) | 48 (38, 57)                             | 37 (21, 57)                  | 41 (23, 58)    | 42 (25, 60)    | 42 (25, 61)                     | 67.6% (48.0%, 81.4%)                             | 69.4% (49.3%, 82.2%)     | 70.2% (49.6%, 83.9%)      | 72.4% (52.4%, 84.6%)     |
| PMR                                                                                                                                                                                           | 47 (37, 56)           | 48 (38, 56) | 49 (39, 57) | 50 (40, 57)                             | 35 (19, 55)                  | 36 (21, 55)    | 39 (22, 57)    | 41 (23, 59)                     | 68.7% (49.5%, 81.9%)                             | 71.2% (51.2%, 83.4%)     | 72.7% (53.4%, 84.3%)      | 74.4% (52.9%, 86.5%)     |
| PM                                                                                                                                                                                            | 50 (40, 57)           | 50 (41, 57) | 50 (41, 57) | 52 (42, 58)                             | 46 (28, 62)                  | 47 (30, 62)    | 46 (29, 62)    | 47 (29, 63)                     | 67.1% (48.0%, 81.1%)                             | 68.3% (47.3%, 82.2%)     | 70.4% (51.2%, 82.9%)      | 70.8% (50.4%, 84.6%)     |
| NS                                                                                                                                                                                            | 49 (39, 57)           | 50 (39, 58) | 50 (40, 58) | 51 (41, 57)                             | 43 (26, 61)                  | 46 (29, 63)    | 48 (27, 67)    | 49 (30, 67)                     | 71.3% (52.3%, 84.3%)                             | 71.9% (52.1%, 84.7%)     | 73.3% (53.1%, 86.3%)      | 76.2% (58.6%, 87.4%)     |
| Neuro                                                                                                                                                                                         | 48 (38, 56)           | 47 (37, 56) | 49 (39, 57) | 48 (39, 56)                             | 41 (24, 59)                  | 43 (25, 60)    | 42 (24, 60)    | 44 (28, 61)                     | 66.0% (44.8%, 81.3%)                             | 67.1% (46.2%, 81.2%)     | 67.4% (42.7%, 80.0%)      | 70.8% (49.5%, 84.0%)     |
| Rheum                                                                                                                                                                                         | 50 (41, 57)           | 50 (40, 57) | 51 (41, 58) | 49 (40, 57)                             | 45 (27, 62)                  | 44 (29, 62)    | 45 (27, 60)    | 45 (28, 62)                     | 69.0% (46.1%, 83.4%)                             | 68.7% (47.3%, 84.2%)     | 69.5% (53.0%, 84.5%)      | 73.2% (48.0%, 85.8%)     |
| MD Oth                                                                                                                                                                                        | 47 (36, 56)           | 47 (36, 56) | 48 (38, 56) | 50 (40, 58)                             | 43 (26, 61)                  | 43 (27, 61)    | 43 (26, 61)    | 45 (27, 63)                     | 69.9% (48.6%, 83.2%)                             | 70.5% (49.9%, 84.3%)     | 73.0% (53.7%, 86.1%)      | 73.5% (53.4%, 85.8%)     |
| EM                                                                                                                                                                                            | 39 (30, 50)           | 41 (31, 52) | 43 (32, 52) | 43 (33, 52)                             | 51 (33, 67)                  | 52 (35, 67)    | 51 (36, 66)    | 51 (34, 67)                     | 66.5% (40.5%, 83.4%)                             | 69.6% (43.5%, 84.5%)     | 70.5% (44.2%, 86.8%)      | 71.3% (45.0%, 86.1%)     |
| Rad                                                                                                                                                                                           | 44 (32, 55)           | 45 (34, 55) | 46 (35, 55) | 48 (37, 56)                             | 48 (30, 66)                  | 47 (29, 64)    | 46 (28, 63)    | 47 (27, 64)                     | 71.2% (46.4%, 85.5%)                             | 74.3% (52.6%, 86.9%)     | 75.5% (55.8%, 87.5%)      | 76.1% (54.8%, 88.6%)     |
| UC                                                                                                                                                                                            | 39 (30, 50)           | 40 (31, 50) | 40 (32, 51) | 46 (37, 54)                             | 40 (25, 57)                  | 35 (22, 51)    | 34 (21, 49)    | 43 (30, 55)                     | 63.4% (40.2%, 80.8%)                             | 68.6% (48.3%, 83.6%)     | 71.4% (51.6%, 85.2%)      | 77.0% (55.9%, 87.7%)     |

PCP=primary care provider, DO=doctor of osteopathy, DC=doctor of chiropractic, PT=physical therapist, LAc=licensed acupuncturist, OS=orthopedic surgeon, PMR=physical medicine & rehabilitation, PM=pain medicine, NS=neurosurgeon, Neuro=neurologist, Rheum=rheumatologist, MD Oth = other medical physician, EM=emergency medicine, Rad=radiologist, UC=urgent care
