# Supplementary material for: Low back pain care pathways – is the last provider seen more important than the first: A retrospective cohort study
Source: bioRxiv or medRxiv preprint supplement (doi:10.1101/2022.10.27.22281624), 2022-11-22
Supplement: Supplementary file [file media-4.pdf]

Supplement 4 - Percent of episodes where type of health care provider (HCP) was the last HCP seen by episode sequence and population Area Deprivation Index (ADI) and percent of the population that is non-Hispanic white (% NHW)

|        | Initial HCP - No 2nd  |          |                       |          |                       |          | 2nd HCP - No 3rd      |          |                       |          |                       |          |
|--------|-----------------------|----------|-----------------------|----------|-----------------------|----------|-----------------------|----------|-----------------------|----------|-----------------------|----------|
|        | ADI 75-100 % NHW 0-25 |          | ADI 50-75 % NHW 50-75 |          | ADI 0-25 % NHW 75-100 |          | ADI 75-100 % NHW 0-25 |          | ADI 50-75 % NHW 50-75 |          | ADI 0-25 % NHW 75-100 |          |
|        | Episodes              | % No 2nd | Episodes              | % No 2nd | Episodes              | % No 2nd | Episodes              | % No 3rd | Episodes              | % No 3rd | Episodes              | % No 3rd |
| PCP    | 5641                  | 74.0%    | 17431                 | 71.6%    | 14563                 | 69.3%    | 1182                  | 67.3%    | 3995                  | 65.3%    | 3343                  | 64.9%    |
| Nurse  | 1267                  | 64.4%    | 4286                  | 64.0%    | 2350                  | 56.2%    | 406                   | 65.0%    | 1429                  | 61.1%    | 844                   | 59.4%    |
| PA     | 793                   | 60.8%    | 2743                  | 57.3%    | 2301                  | 56.9%    | 280                   | 58.6%    | 991                   | 57.0%    | 826                   | 53.3%    |
| DO     | 5                     | 80.0%    | 46                    | 73.9%    | 67                    | 76.1%    | 1                     | 100.0%   | 3                     | 100.0%   | 9                     | 55.6%    |
| DC     | 1629                  | 84.0%    | 11124                 | 84.3%    | 13206                 | 84.9%    | 269                   | 73.6%    | 1646                  | 72.4%    | 1762                  | 73.7%    |
| PT     | 62                    | 71.0%    | 318                   | 61.3%    | 824                   | 59.5%    | 105                   | 72.4%    | 511                   | 72.4%    | 1127                  | 69.5%    |
| LAc    | 25                    | 92.0%    | 88                    | 78.4%    | 408                   | 83.1%    | 2                     | 50.0%    | 16                    | 62.5%    | 70                    | 64.3%    |
| OS     | 504                   | 64.5%    | 2326                  | 62.4%    | 3576                  | 61.7%    | 210                   | 56.7%    | 925                   | 57.0%    | 1284                  | 54.2%    |
| PMR    | 219                   | 62.6%    | 903                   | 63.9%    | 1807                  | 62.1%    | 111                   | 55.0%    | 422                   | 59.0%    | 797                   | 57.7%    |
| PM     | 226                   | 66.8%    | 988                   | 61.3%    | 793                   | 61.8%    | 117                   | 53.0%    | 486                   | 52.7%    | 394                   | 54.1%    |
| NS     | 72                    | 51.4%    | 280                   | 49.3%    | 335                   | 54.0%    | 36                    | 58.3%    | 214                   | 52.3%    | 218                   | 45.0%    |
| Neuro  | 69                    | 71.0%    | 361                   | 55.1%    | 431                   | 57.5%    | 43                    | 72.1%    | 169                   | 55.0%    | 164                   | 57.3%    |
| Rheum  | 81                    | 58.0%    | 318                   | 65.1%    | 311                   | 61.7%    | 43                    | 55.8%    | 144                   | 52.1%    | 131                   | 49.6%    |
| MD Oth | 333                   | 54.4%    | 1345                  | 54.5%    | 1361                  | 54.1%    | 168                   | 63.1%    | 630                   | 57.8%    | 651                   | 59.4%    |
| EM     | 802                   | 64.8%    | 1568                  | 61.3%    | 1093                  | 56.2%    | 221                   | 67.4%    | 495                   | 56.8%    | 358                   | 50.0%    |
| Rad    | 1055                  | 54.1%    | 2851                  | 50.2%    | 2837                  | 46.6%    | 667                   | 53.5%    | 2172                  | 49.9%    | 2398                  | 47.1%    |
| UC     | 175                   | 77.7%    | 391                   | 61.9%    | 443                   | 58.7%    | 30                    | 73.3%    | 113                   | 65.5%    | 147                   | 63.9%    |
|        | 3rd HCP - No 4th      |          |                       |          |                       |          | 4th HCP - No 5th      |          |                       |          |                       |          |
|        | ADI 75-100 % NHW 0-25 |          | ADI 50-75 % NHW 50-75 |          | ADI 0-25 % NHW 75-100 |          | ADI 75-100 % NHW 0-25 |          | ADI 50-75 % NHW 50-75 |          | ADI 0-25 % NHW 75-100 |          |
|        | Episodes              | % No 4th | Episodes              | % No 4th | Episodes              | % No 4th | Episodes              | % No 5th | Episodes              | % No 5th | Episodes              | % No 5th |
| PCP    | 537                   | 61.8%    | 1855                  | 62.1%    | 1468                  | 59.8%    | 234                   | 62.0%    | 954                   | 57.0%    | 704                   | 53.3%    |
| Nurse  | 191                   | 62.3%    | 743                   | 51.7%    | 412                   | 54.6%    | 89                    | 46.1%    | 416                   | 49.8%    | 244                   | 46.3%    |
| PA     | 129                   | 60.5%    | 524                   | 49.8%    | 392                   | 44.9%    | 63                    | 61.9%    | 285                   | 41.4%    | 239                   | 48.5%    |
| DO     | 0                     | N/A      | 8                     | 62.5%    | 9                     | 66.7%    | 0                     | N/A      | 2                     | 100.0%   | 5                     | 20.0%    |
| DC     | 99                    | 61.6%    | 799                   | 67.8%    | 801                   | 67.5%    | 58                    | 60.3%    | 357                   | 63.6%    | 364                   | 63.2%    |
| PT     | 76                    | 65.8%    | 369                   | 66.1%    | 776                   | 63.0%    | 49                    | 71.4%    | 239                   | 63.2%    | 461                   | 62.0%    |
| LAc    | 1                     | 0.0%     | 6                     | 50.0%    | 43                    | 72.1%    | 2                     | 100.0%   | 5                     | 60.0%    | 18                    | 55.6%    |
| OS     | 142                   | 62.0%    | 590                   | 50.5%    | 741                   | 52.6%    | 93                    | 52.7%    | 348                   | 51.1%    | 428                   | 51.2%    |
| PMR    | 90                    | 56.7%    | 336                   | 60.4%    | 545                   | 61.5%    | 64                    | 56.2%    | 219                   | 56.2%    | 360                   | 59.2%    |
| PM     | 101                   | 61.4%    | 433                   | 55.9%    | 345                   | 56.2%    | 72                    | 44.4%    | 335                   | 59.4%    | 249                   | 53.0%    |
| NS     | 40                    | 52.5%    | 164                   | 47.0%    | 198                   | 42.9%    | 29                    | 34.5%    | 124                   | 42.7%    | 127                   | 42.5%    |
| Neuro  | 18                    | 66.7%    | 101                   | 57.4%    | 114                   | 50.0%    | 12                    | 41.7%    | 77                    | 49.4%    | 60                    | 41.7%    |
| Rheum  | 25                    | 60.0%    | 84                    | 52.4%    | 74                    | 54.1%    | 13                    | 46.2%    | 63                    | 49.2%    | 48                    | 60.4%    |
| MD Oth | 89                    | 58.4%    | 398                   | 57.0%    | 422                   | 52.1%    | 67                    | 58.2%    | 287                   | 48.1%    | 274                   | 54.0%    |
| EM     | 71                    | 52.1%    | 166                   | 48.8%    | 108                   | 44.4%    | 35                    | 57.1%    | 84                    | 56.0%    | 51                    | 43.1%    |
| Rad    | 245                   | 42.0%    | 969                   | 44.9%    | 1088                  | 40.9%    | 118                   | 37.3%    | 498                   | 36.1%    | 586                   | 40.3%    |
| UC     | 8                     | 25.0%    | 25                    | 44.0%    | 29                    | 62.1%    | 3                     | 33.3%    | 8                     | 37.5%    | 11                    | 27.3%    |

Cells in red have risk ratio 95% confidence interval crossing the PCP reference of 1

Cells highlighted with bold font have risk ratio 95% plus confidence interval greater than the PCP reference of 1 indicating greater likelihood to be the last HCP seen

PCP=primary care provider, DO=doctor of osteopathy, DC=doctor of chiropractic, PT=physical therapist, LAc=licensed acupuncturist, OS=orthopedic surgeon, PMR=physical medicine & rehabilitation, PM=pain medicine, NS=neurosurgeon, Neuro=neurologist, Rheum=rheumatologist, MD Oth = other medical physician, EM=emergency medicine, Rad=radiologist, UC=urgent care
