# Supplementary material for: Low back pain care pathways – is the last provider seen more important than the first: A retrospective cohort study
Source: bioRxiv or medRxiv preprint supplement (doi:10.1101/2022.10.27.22281624), 2022-11-22
Supplement: Supplementary file [file media-5.pdf]

Supplement 4a - Risk ratio and 95% confidence interval compared to primary care provider (PCP) reference for percent of episodes where type of health care provider (HCP) was the last HCP seen by episode sequence and population Area Deprivation Index (ADI) reference and percent of the population that is non-Hispanic white (% NHW)

|           | Initial HCP - No 2nd |                      |                      | 2nd HCP - No 3rd     |                      |                      |
|-----------|----------------------|----------------------|----------------------|----------------------|----------------------|----------------------|
|           | 75-100 ADI 0-25% NHW | 50-75 ADI 50-75% NHW | 0-25 ADI 75-100% NHW | 75-100 ADI 0-25% NHW | 50-75 ADI 50-75% NHW | 0-25 ADI 75-100% NHW |
| PCP - ref | 1                    | 1                    | 1                    | 1                    | 1                    | 1                    |
| Nurse     | 0.87 (0.83, 0.91)    | 0.89 (0.87, 0.92)    | 0.81 (0.78, 0.84)    | 0.97 (0.89, 1.05)    | 0.94 (0.89, 0.98)    | 0.91 (0.86, 0.97)    |
| PA        | 0.82 (0.77, 0.87)    | 0.80 (0.77, 0.83)    | 0.82 (0.79, 0.85)    | 0.87 (0.78, 0.97)    | 0.87 (0.82, 0.93)    | 0.82 (0.77, 0.88)    |
| DO        | 1.08 (0.70, 1.68)    | 1.03 (0.87, 1.23)    | 1.10 (0.96, 1.26)    | 1.48 (1.43, 1.55)    | 1.53 (1.50, 1.57)    | 0.86 (0.48, 1.54)    |
| DC        | 1.13 (1.11, 1.16)    | 1.18 (1.16, 1.19)    | 1.23 (1.21, 1.24)    | 1.09 (1.01, 1.19)    | 1.11 (1.07, 1.15)    | 1.14 (1.09, 1.18)    |
| PT        | 0.96 (0.82, 1.12)    | 0.86 (0.78, 0.94)    | 0.86 (0.81, 0.91)    | 1.07 (0.95, 1.22)    | 1.11 (1.05, 1.17)    | 1.07 (1.02, 1.12)    |
| LAc       | 1.24 (1.11, 1.40)    | 1.10 (0.98, 1.22)    | 1.20 (1.15, 1.25)    | 0.74 (0.19, 2.97)    | 0.96 (0.65, 1.40)    | 0.99 (0.83, 1.18)    |
| OS        | 0.87 (0.81, 0.93)    | 0.87 (0.84, 0.90)    | 0.89 (0.87, 0.92)    | 0.84 (0.74, 0.95)    | 0.87 (0.82, 0.93)    | 0.83 (0.79, 0.88)    |
| PMR       | 0.85 (0.76, 0.94)    | 0.89 (0.85, 0.94)    | 0.90 (0.86, 0.93)    | 0.82 (0.69, 0.97)    | 0.90 (0.83, 0.98)    | 0.89 (0.83, 0.95)    |
| PM        | 0.90 (0.82, 0.99)    | 0.86 (0.81, 0.90)    | 0.89 (0.84, 0.94)    | 0.79 (0.66, 0.94)    | 0.81 (0.74, 0.88)    | 0.83 (0.76, 0.91)    |
| NS        | 0.69 (0.55, 0.87)    | 0.69 (0.61, 0.78)    | 0.78 (0.71, 0.86)    | 0.87 (0.66, 1.14)    | 0.80 (0.70, 0.91)    | 0.69 (0.60, 0.80)    |
| Neuro     | 0.96 (0.82, 1.12)    | 0.77 (0.70, 0.85)    | 0.83 (0.77, 0.90)    | 1.07 (0.89, 1.29)    | 0.84 (0.73, 0.97)    | 0.88 (0.77, 1.01)    |
| Rheum     | 0.78 (0.65, 0.94)    | 0.91 (0.84, 0.99)    | 0.89 (0.82, 0.97)    | 0.83 (0.63, 1.08)    | 0.80 (0.68, 0.93)    | 0.76 (0.64, 0.91)    |
| MD Oth    | 0.73 (0.66, 0.81)    | 0.76 (0.72, 0.80)    | 0.78 (0.74, 0.82)    | 0.94 (0.83, 1.06)    | 0.88 (0.82, 0.95)    | 0.92 (0.86, 0.98)    |
| EM        | 0.88 (0.83, 0.92)    | 0.86 (0.82, 0.89)    | 0.81 (0.77, 0.86)    | 1.00 (0.91, 1.11)    | 0.87 (0.80, 0.94)    | 0.77 (0.69, 0.86)    |
| Rad       | 0.73 (0.69, 0.77)    | 0.70 (0.67, 0.73)    | 0.67 (0.65, 0.70)    | 0.79 (0.73, 0.86)    | 0.76 (0.73, 0.80)    | 0.72 (0.69, 0.76)    |
| UC        | 1.05 (0.97, 1.14)    | 0.86 (0.80, 0.94)    | 0.85 (0.78, 0.92)    | 1.09 (0.87, 1.36)    | 1.00 (0.88, 1.15)    | 0.98 (0.87, 1.11)    |
|           | 3rd HCP - No 4th     |                      |                      | 4th HCP - No 5th     |                      |                      |
|           | 75-100 ADI 0-25% NHW | 50-75 ADI 50-75% NHW | 0-25 ADI 75-100% NHW | 75-100 ADI 0-25% NHW | 50-75 ADI 50-75% NHW | 0-25 ADI 75-100% NHW |
| PCP - ref | 1                    | 1                    | 1                    | 1                    | 1                    | 1                    |
| Nurse     | 0.94 (0.82, 1.09)    | 0.83 (0.75, 0.91)    | 0.92 (0.82, 1.03)    | 0.79 (0.58, 1.07)    | 0.87 (0.75, 1.01)    | 0.85 (0.69, 1.05)    |
| PA        | 0.92 (0.77, 1.10)    | 0.81 (0.73, 0.90)    | 0.77 (0.67, 0.88)    | 1.07 (0.80, 1.44)    | 0.71 (0.58, 0.86)    | 0.96 (0.79, 1.15)    |
| DO        | N/A                  | 0.93 (0.49, 1.76)    | 1.05 (0.61, 1.80)    | N/A                  | 1.75 (1.62, 1.88)    | N/A                  |
| DC        | 0.97 (0.80, 1.18)    | 1.08 (1.01, 1.16)    | 1.14 (1.06, 1.23)    | 1.11 (0.81, 1.52)    | 1.07 (0.93, 1.23)    | 1.16 (0.99, 1.35)    |
| PT        | 0.94 (0.75, 1.17)    | 1.02 (0.92, 1.12)    | 1.05 (0.97, 1.13)    | 1.18 (0.92, 1.51)    | 1.16 (1.02, 1.32)    | 1.18 (1.04, 1.34)    |
| LAc       | N/A                  | 0.41 (0.07, 2.21)    | 1.25 (1.01, 1.54)    | 1.66 (1.45, 1.91)    | 0.87 (0.33, 2.34)    | 1.51 (1.05, 2.16)    |
| OS        | 0.96 (0.81, 1.13)    | 0.81 (0.73, 0.90)    | 0.87 (0.80, 0.96)    | 0.88 (0.67, 1.16)    | 0.87 (0.74, 1.02)    | 0.97 (0.83, 1.12)    |
| PMR       | 0.80 (0.63, 1.00)    | 0.99 (0.89, 1.10)    | 1.02 (0.93, 1.12)    | 0.95 (0.71, 1.28)    | 0.91 (0.76, 1.09)    | 1.14 (0.99, 1.31)    |
| PM        | 0.97 (0.80, 1.17)    | 0.93 (0.84, 1.03)    | 0.98 (0.87, 1.09)    | 0.81 (0.58, 1.14)    | 1.05 (0.92, 1.21)    | 1.08 (0.91, 1.27)    |
| NS        | 0.96 (0.72, 1.29)    | 0.75 (0.62, 0.90)    | 0.75 (0.63, 0.90)    | 0.68 (0.38, 1.23)    | 0.80 (0.63, 1.01)    | 0.84 (0.64, 1.09)    |
| Neuro     | 1.07 (0.76, 1.49)    | 1.00 (0.83, 1.21)    | 0.85 (0.69, 1.05)    | 1.11 (0.49, 2.50)    | 0.82 (0.59, 1.12)    | 0.87 (0.60, 1.25)    |
| Rheum     | 0.86 (0.57, 1.31)    | 0.88 (0.69, 1.11)    | 0.92 (0.72, 1.17)    | 1.25 (0.70, 2.23)    | 0.79 (0.54, 1.16)    | 1.05 (0.77, 1.45)    |
| MD Oth    | 0.94 (0.76, 1.16)    | 0.89 (0.79, 1.00)    | 0.84 (0.75, 0.95)    | 1.02 (0.77, 1.36)    | 0.88 (0.74, 1.04)    | 1.03 (0.87, 1.22)    |
| EM        | 0.84 (0.66, 1.07)    | 0.82 (0.69, 0.98)    | 0.77 (0.61, 0.96)    | 0.93 (0.64, 1.35)    | 0.86 (0.63, 1.16)    | 0.92 (0.65, 1.30)    |
| Rad       | 0.66 (0.56, 0.79)    | 0.73 (0.67, 0.80)    | 0.69 (0.63, 0.75)    | 0.70 (0.51, 0.94)    | 0.60 (0.51, 0.71)    | 0.80 (0.69, 0.93)    |
| UC        | 0.31 (0.05, 1.79)    | 0.57 (0.31, 1.03)    | 1.01 (0.73, 1.40)    | N/A                  | 1.05 (0.51, 2.15)    | 0.58 (0.22, 1.51)    |

Cells in red have risk ratio 95% confidence interval crossing the PCP reference of 1

Cells highlighted with bold font have at least 20 episodes and risk ratio 95% plus confidence interval greater than the PCP reference of 1 indicating greater likelihood to be the last HCP seen

PCP=primary care provider, DO=doctor of osteopathy, DC=doctor of chiropractic, PT=physical therapist, LAc=licensed acupuncturist, OS=orthopedic surgeon, PMR=physical medicine & rehabilitation, PM=pain medicine, NS=neurosurgeon, Neuro=neurologist, Rheum=rheumatologist, MD Oth = other medical physician, EM=emergency medicine, Rad=radiologist, UC=urgent care
